## Ultrafast Light Targeting for High-Throughput Precise Control of Neuronal Networks

Giulia Faini\*, Clément Molinier\*, Cécile Telliez,  
Christophe Tourain, Benoît C. Forget, Emiliano Ronzitti ‡, and Valentina Emiliani ‡

<sup>1</sup> Institut de la Vision, Sorbonne Université, Inserm S968, CNRS UMR7210, 17 Rue Moreau, 75012 Paris

\* Equally contributing authors

‡ correspondence:

[emiliano.ronzitti@inserm.fr](mailto:emiliano.ronzitti@inserm.fr)

[valentina.emiliani@inserm.fr](mailto:valentina.emiliani@inserm.fr)

### ABSTRACT

Understanding how specific sets of neurons fire and wire together during cognitive-relevant activity is one of the most pressing questions in neuroscience. Two-photon, single-cell resolution optogenetics based on holographic light-targeting approaches enables accurate spatio-temporal control of individual or multiple neurons. Yet, currently, the ability to drive asynchronous activity in distinct cells is critically limited to a few milliseconds and the achievable number of targets to several dozens. In order to expand the capability of single-cell optogenetics, we introduce an approach capable of ultra-fast sequential light targeting (FLiT), based on switching temporally focused beams between holograms at kHz rates. We demonstrate serial-parallel photostimulation strategies capable of multi-cell sub-millisecond temporal control and many-fold expansion of the number of activated cells. This approach will be important for experiments that require rapid and precise cell stimulation with defined spatio-temporal activity patterns and optical control of large neuronal ensembles.

### INTRODUCTION

Optogenetic neuronal excitation using single-photon widefield illumination has already proven its enormous potential in neuroscience, enabling the optical manipulation of entire neuronal networks and to disentangle their role in the control of specific behaviors<sup>1,2</sup>. However, establishing how the activity of a single neuron or neuronal ensemble impacts a specific behavior, or how functionally

37 identical neurons are connected and involved in a particular task, requires the precise control of  
38 single or multiple cells independently in space and time. This has imposed a transition from widefield  
39 optogenetics into a more sophisticated technology that we termed few years ago: circuit  
40 optogenetics<sup>3</sup>. Circuit optogenetics combines progress in opsin engineering, holographic light  
41 shaping and high-power fiber laser development. Using two-photon holographic illumination of fast-  
42 photocycle-, soma-targeted-opsins, it permits single or multi-spike generation with cellular  
43 resolution, sub-millisecond precision and high spiking rates deep in tissue<sup>3</sup>. Using multiplexed spiral  
44 scanning<sup>4</sup> or multiplexed temporally focused light shaping approaches<sup>5-7</sup>, combined with high energy  
45 fiber lasers and soma-targeted opsins<sup>8,9</sup>, it also enables simultaneous control of multiple targets in  
46 3D  $\sim mm^3$  volumes at cellular resolution<sup>10-12</sup>.

47 The unprecedented spatiotemporal precision of circuit optogenetics has enabled high throughput  
48 connectivity mapping in living zebrafish larvae<sup>13</sup> and probing rod bipolar cell output across multiple  
49 layers of the mouse retina<sup>14</sup>. Combined with two photon  $Ca^{2+}$  imaging and behavioural assays, circuit  
50 optogenetics has been used to show that the activation of few cells can bias behavior by triggering  
51 the activity of precisely-defined ensembles in the mouse visual cortex<sup>11,12,15</sup>. Importantly, sequential  
52 projection of multiple holographic patterns at variable time intervals in the mouse olfactory bulb has  
53 revealed how the perceptual responses of mice not only depend on the specific group of cells and  
54 cell numbers activated but also on their relative activation latency<sup>16</sup>.

55 These pioneering works suggest a number of new exciting experimental paradigms for circuit  
56 optogenetics, e.g., the investigation of the temporal bounds of functional connectivity within which  
57 neurons “fire and wire together”, or how many targets need to be activated to perturb complex  
58 behavioral responses or how large neuronal ensembles, eventually spanning across multiple cortical  
59 layers, are functionally connected. Answering these questions requires the capability to manipulate  
60 neuronal activity at fine (sub-millisecond) temporal scales and/or large cell populations, which  
61 ultimately requires overcoming the current intrinsic technological limitations of holographic light  
62 patterning, specifically the low speed of liquid crystal spatial light modulators (LC-SLMs) and the high  
63 illumination power necessary for multi-target excitation.

64 Multi-target optogenetics uses holographic light shaping to multiplex the excitation beam to  
65 multiple locations, combined with either spiral scanning or temporally focused light shaping  
66 approaches<sup>17,18</sup>.

67 In spiral scanning approaches, a LC-SLM is used to multiplex the illumination beam into several  
68 diffraction limited spots which are scanned in spiral trajectories using a pair of galvanometric mirrors  
69 (GM), each spanning a different neuron.

70 Several multiplexed temporally focused light shaping (MTF-LS) approaches have been developed<sup>5</sup>,  
71 which differ in terms of the approach used for light patterning. Generally, MTF-LS systems are  
72 comprised of three units: (1) a beam shaping unit sculpts light into particular forms, (2) a diffraction  
73 grating placed in a conjugate image plane confines photostimulation to a shallow axial region with  
74 cellular dimensions and (3) a LC-SLM multiplexes the sculpted light to multiple sample locations  
75 (Fig.1A).

76 This configuration admits multiple variants depending on the beam shaping unit used, which also  
77 defines the extent of the beam profile at the multiplexing LC-SLM<sup>5</sup>. Beam shaping units based on  
78 computer generated holography illuminate the second LC-SLM with either a single chirped hologram  
79 of the size of the LC-SLM matrix<sup>6</sup> or with multiple chirped holograms<sup>19</sup>, while the use of an expanded  
80 gaussian beam<sup>20</sup> or of the generalized phase contrast method<sup>6</sup>, produces a chirped horizontal line  
81 (typically ~ 2 mm high and ~ 16 mm wide) covering the horizontal dimension of the LC-SLM or a  
82 diffused chirped spot which illuminates the entire LC-SLM matrix<sup>7</sup> (Supplementary Fig.1).

83 In all described approaches, sequential generation of independent illumination patterns is achieved  
84 by projecting multiple holograms at a rate limited by the LC-SLM refresh rate (60-500 Hz) and cell  
85 illumination times (from ~1 ms to dozens of ms).

86 Moreover, multi-target illumination based on holography requires powerful lasers since the laser  
87 energy is divided between different targets<sup>3,17,21</sup>. While in principle this enables the simultaneous  
88 photostimulation of hundreds of target cells, the necessity of maintaining brain temperature within  
89 physiological thresholds<sup>10,22,23</sup> has thus far limited the maximum number to a few dozens.

90 Here, we suggest a new approach for ultra-fast sequential light targeting (FLiT) based on rapid  
91 displacement of temporally-focused sculpted light through multiple, vertically-aligned, holograms.  
92 We demonstrated that optogenetic FLiT enables tuning of distinct cells with microsecond resolution  
93 and a 20 (or more) times increase of achievable targets with minimal thermal crosstalk.

94 This novel capability of arbitrarily desynchronizing (or synchronizing) groups of neurons will  
95 facilitate the study of the influence of spike timing on synaptic integration, plasticity and information  
96 coding, and scaling up the number of cells activable whilst remaining safely below the threshold for  
97 thermal damage.

98

## 99 **RESULTS:**

100

### 101 ***Ultra Fast Light-Targeting (FLiT)***

102 Here we introduce a new configuration of MTF-LS for ultra-fast sequential light targeting (FLiT),  
103 where the multiplexing LC-SLM is addressed with multiple vertically tiled holograms. A  
104 galvanometric mirror (GM) is incorporated upstream (Fig.1B) to sweep the chirped expanded

105 gaussian beam across the holograms and generate sequential 2D (Fig.1C; Supplementary Movie 1) or  
106 3D (Fig.1D) illumination patterns.

107 To characterize the optical properties of FLiT, we first characterized the effect of the hologram  
108 tiling on the holographic spot intensity, ellipticity (i.e., ratio between vertical (y) and horizontal (x)  
109 length) and axial resolution by projecting on a thin rhodamine layer a single spot encoded by tiled  
110 holograms with different vertical extents (see Methods). We did not observe a significant  
111 deterioration of the axial resolution decreasing the tile extent to 12 lines (corresponding to 50 tiled  
112 holograms for the particular LC-SLM used), while we observed a decrease of a factor  $\geq 2$  in spot  
113 intensity and ellipticity by decreasing the tile extent to  $\leq 20$  lines (corresponding to 30 tiled  
114 holograms) (Supplementary Fig.2).

115 We then evaluated, for the case of 30 lines per tiled hologram (20 tiled phase holograms,  $\varphi_i$ ), the  
116 influence of the location of the hologram on the LC-SLM on spot intensity and axial resolution by  
117 deflecting the chirped beam across 20 2D holograms (each encoding the same group of spots) using  
118 the GM. For each hologram, the intensity was homogeneously distributed among spots generated in  
119 a field of excitation (FoE) of  $120 \times 120 \mu\text{m}^2$  (Fig.1C; Supplementary Fig.3). For patterns encoded in  
120 holograms located in central regions of the LC-SLM, we observed a  $\geq 25\%$  higher average intensity  
121 than in patterns generated by distal holograms ( $\varphi_i \leq 4$ ;  $\varphi_i \geq 14$ ; Supplementary Fig.3). Although  
122 we observed a moderate axial tilt of the spots generated by using distal holograms, the axial  
123 resolution of the spots was preserved both within the FoE and while scanning across the different  
124 holograms ( $6.5 \pm 0.5 \mu\text{m}$ ; Supplementary Fig.4). Importantly, spot intensity homogeneity and axial  
125 confinement were maintained when spots were randomly distributed in  $120 \times 120 \times 70 \mu\text{m}^3$  volume  
126 (Supplementary Fig.5).

127 Next, we studied how the velocity of the scan unit defines the temporal resolution of FLiT.  
128 Specifically, we tested the minimum switching time to (i) move between two adjacent holograms  
129 (Fig.2A-B) and (ii) sequentially illuminate all holograms at constant rate (Fig.2E-F). For this, we  
130 generated 20 equivalent holograms each projecting a single spot on a photodiode placed in a  
131 conjugate image plane (Fig.2A and Fig.2E) (see details in Methods). In the first case, we measured a  
132 switching time of  $90 \pm 10 \mu\text{s}$  (Fig.2C-D,  $n = 30$  measurements), while in the second case, we could  
133 reach a switching time of  $50 \pm 10 \mu\text{s}$  (Fig.2G-H,  $n = 30$  measurements).

134 Taken together these results indicate that FLiT enables sequential generation of multiple patterns  
135 with no significant deterioration of spot quality or axial resolution for up to 12 phase holograms. By  
136 scanning the chirped beam among the multiple holograms, it is possible to reach up to few tens of  
137 kHz switching rate, which is more than one order of magnitude faster than what is achievable with  
138 alternative parallel approaches using phase modulation<sup>11</sup>.

139

### 140 ***Precisely replaying physiological patterns of activity***

141 In order to demonstrate the capabilities of FLiT to control neuronal activity at high switching rate,  
142 we photoactivated neurons expressing the soma-restricted opsin ST-ChroME<sup>10</sup> while recording  
143 cellular activity via whole-cell patch clamp recordings in acute cortical brain slices (see Methods and  
144 Supplementary Fig.6A).

145 We initially tested the illumination conditions (excitation power, illumination time and spot size)  
146 for reliable action potential (AP) generation. Consistent with results previously obtained in standard  
147 2P holographic configurations<sup>9,21,24</sup>, APs could be reliably elicited with sub-ms jitter ( $0.25 \pm 0.13$  ms;  
148  $n = 13$  cells; Supplementary Fig.7) upon selective targeting of cell somata (spot size = 10  $\mu\text{m}$ ) with  
149 illumination times as short as 4-5 ms. These values and the LC-SLM refresh rate (60-500 Hz)<sup>10,11</sup> set  
150 the effective temporal resolution for sequential photostimulation in common holographic light  
151 patterning techniques.

152 Here, we demonstrate that FLiT overcomes this limit by enabling sub-millisecond temporal  
153 resolution independently of the illumination time and LC-SLM switching rate (Fig.3A). Briefly, if two  
154 groups of cells (group A and B) need to be activated with a temporal delay shorter than the  
155 necessary illumination time (dwell-time), one can use 3 phase holograms: the first one ( $\varphi_A$ )  
156 generating a light pattern to excite the group A, the second one ( $\varphi_B$ ) to excite the group B and the  
157 intermediate one ( $\varphi_{AB}$ ) to excite both groups, A and B. By steering the beam across the three  
158 holograms, each with a specific illumination time and intensity, it is possible to sequentially  
159 stimulate the two groups of cells with tightly controlled delays, only limited by the GM scanning time  
160 (i.e., in our case  $\geq 90$   $\mu\text{s}$ ). Notably, the same principle can be extended to  $n$  groups of cells by using  
161  $2n-1$  tiled holograms and sequentially addressing the different groups in parallel or individually  
162 (Supplementary Fig.8). We call this configuration serial/parallel FLiT (S/P-FLiT).

163 We demonstrated the capability of S/P-FLiT for ultra-fast sequential light targeting by  
164 photostimulating two ST-ChroME-expressing neurons while monitoring the evoked activity by  
165 double-patch electrophysiological recordings (Fig.3B). First, we verified that amplitudes and kinetics  
166 of induced photocurrents were not affected by switching the illumination between the different  
167 holograms (Supplementary Fig.9). We then assessed the precision in controlling the relative spiking  
168 time among the two cells by photoactivating the two patched neurons with tightly controlled delays,  
169  $\delta t$ , ranging from 0.2 to 3 ms, while measuring the corresponding spiking delay time  $\delta t_{AP}^{\text{exp}}$  (Fig.3B).  
170 We found that spike delays  $\delta t_{AP}^{\text{exp}}$  can be controlled with few hundreds  $\mu\text{s}$  temporal  
171 accuracy,  $|\delta t_{AP}^{\text{exp}} - \delta t|$ , ( $96 \pm 114$   $\mu\text{s}$ ,  $n = 12$  pairs of cells; Fig.3C and Supplementary Fig.10).

172 Furthermore, the photocurrent magnitude was found to be approximately independent of the  
173 vertical position of the tiled hologram (Supplementary Fig.11).

174 Finally, we demonstrated the capability of S/P-FLiT to precisely mimic random spiking activity in  
175 two distinct neurons. To this end, we photostimulated two neurons with distinct spiking patterns  
176 based on physiological activity (Fig.3D). Light-driven mimicking was precisely controlled with few  
177 hundreds of  $\mu\text{s}$  temporal accuracy,  $|\delta t_{APi}^{\text{exp}} - \delta t_i|$ , where  $i$  indicates the AP ordinal number in the  
178 train ( $11 \pm 122 \mu\text{s}$ ;  $n = 12$  pairs of cells; Fig.3E and Supplementary Fig.12).

179 Taken together, these results indicate that S/P-FLiT enables precise sub-millisecond tuning of  
180 neuronal activity in distinct neurons or groups of neurons.

181

### 182 ***High-throughput activation of multiple cells by tuning illumination to match properties of opsin*** 183 ***photocycle***

184 Here we demonstrated the capability of FLiT to scale up the achievable number of targets for  
185 parallel multi-cell illumination.

186 In conventional parallel illumination approaches, the simultaneous excitation of  $n$  targets requires  
187 an excitation power of  $n \cdot P_{std}$ , where  $P_{std}$  is the excitation power which needs to be continuously  
188 applied for a time  $t_{std}$  to activate a single target (Fig.4A). Here we demonstrate that FLiT approach  
189 enables targeting the same number of cells by using cyclic illumination with  $\mu\text{s}$  flashes of light and a  
190 factor of  $\sqrt{n}$  lower power whilst maintaining identical latency and jitter. Alternatively, a factor of  
191  $\sqrt{n}$  more cells can be targeted using the same amount of power. We called this configuration serial-  
192 parallel multi-cell activation FLiT (Multi-S/P FLiT).

193 Briefly, steady illumination of a neuron for a time  $t_{std}$  shorter than the opsin rise time generates  
194 an exponential increase in photocurrent (Fig.4A) and eventually AP generation. Capitalizing on the  
195 properties of the opsin photocycle, a similar photocurrent can be generated by using cyclic  
196 illumination consisting of  $N_{cyc}$  short illumination pulses each of duration  $t_{cyc} \ll t_{std}$ , provided (i)  
197 the time interval,  $T_{cyc}$ , between two pulses is shorter than the off-time decay of the opsin  
198 (Supplementary Note 1) and (ii) the excitation power,  $P_{cyc}$ , generates in a time  $t_{cyc}$  a photocurrent  
199 that after a time  $t = \frac{t_{std}}{N_{cyc}}$ , equals the one that a steady illumination with power  $P_{std}$  would generate  
200 in the same time. It can be shown that this condition is realized for  $P_{cyc} = P_{std} \sqrt{T_{cyc}/t_{cyc}}$   
201 (Supplementary Note 1). If these conditions are satisfied, FLiT can rapidly reposition the excitation  
202 light onto  $n = \frac{T_{cyc}}{t_{cyc}}$  different locations in a time  $t = T_{cyc}$ , thus enabling quasi-simultaneous  
203 activation of  $n$  targets with a power only  $\sqrt{n}$  higher than  $P_{std}$  (Fig.4B).

204 In order to demonstrate this configuration, we divided the LC-SLM in  $n$  tiled holograms, encoding a  
205 soma-targeted illumination of a patched ST-ChroME-expressing neuron on a tiled hologram  $\varphi_i$ . We  
206 then recorded, using whole-cell patch clamp recordings in organotypic slices (Supplementary Fig.6B),  
207 the photoevoked neuronal activity by (i) continuous illumination on  $\varphi_i$  and (ii) steering the laser  
208 across the  $n$  holograms such that each hologram is illuminated for a duration,  $t_{cyc}$ , of 50  $\mu$ s (Fig.4C;  
209 see Methods for details). We define two temporal parameters to characterize the two excitation  
210 conditions described above: the cell illumination time,  $t_{cell}$ , as the total time during which the cell is  
211 illuminated, and the experimental time,  $t_{exp}$ , as the global time needed to evoke an action potential.  
212 Under steady illumination,  $t_{cell}^{std} = t_{exp}^{std} = t_{std}$ , while under cyclic illumination,  $t_{cell}^{cyc} = N_{cyc} \cdot t_{cyc}$  and  
213  $t_{exp}^{cyc} = n \cdot N_{cyc} \cdot t_{cyc}$ , with  $N_{cyc}$  the number of illumination cycles (Fig.4C).  
214 At first, we optimized the excitation power,  $P_{std}$ , to generate reliable APs under steady illumination  
215 for a given  $t_{std} = 5$  ms. We found that for  $P_{std} = 20.4 \pm 9.4$  mW, we could generate APs with  $7.7 \pm 1.1$   
216 ms latency and  $0.36 \pm 0.30$  ms jitter ( $n = 8$  cells, data not shown). Secondly, we compared those  
217 values with the power,  $P_{cyc}$ , and the number of cycles,  $N_{cyc}$ , necessary to evoke an AP in the same  
218 cell under Multi-S/P FLiT illumination (Fig.4D) by keeping either (i) the same excitation power (Fig.4E)  
219 or (ii) the same experimental time used for steady illumination (Fig.4F), i.e. either  $P_{cyc} = P_{std}$  or  $t_{exp}^{cyc} =$   
220  $t_{std}$ , respectively.  
221 We found that in the first condition, Multi-S/P FLiT illumination can reliably generate APs in the  
222 patched cell by using up to 20 holograms (therefore in principle 20 more excitable cells) and  $N_{cyc} =$   
223  $\frac{t_{std}}{t_{cyc}} = 100$ , which corresponds to a total experimental illumination time  $t_{exp}^{cyc} = 100$  ms. Increasing  
224 the number of excitable cells up to 30 and 50 is also possible but requires increasing the excitation  
225 power  $P_{cyc}$  by a factor of  $\sim 1.37 \pm 0.34$  and  $2.48 \pm 0.85$ , respectively (Fig.4E).  
226 As a drawback for using  $t_{exp}^{cyc}$   $n$  times longer than  $t_{std}$ , we measured large increases of AP latency and  
227 jitter (Supplementary Fig.13A). However, using  $P_{cyc} \cong \sqrt{n} \cdot P_{std}$  enabled keeping  $t_{exp}^{cyc} = t_{std} = 5$  ms  
228 and achieving the same spiking properties as under steady illumination (Fig.4F and Supplementary  
229 Fig.13B) in agreement with the theoretical prediction (see Supplementary Note 1).  
230 Overall, the achieved results indicate that Multi-S/P-FLiT potentially enables increasing by  $n = 20$  the  
231 number of achievable cells with no increase in illumination power with respect to that used for  
232 single cell stimulation. Maintaining ms latency and sub-ms jittering is possible by using an excitation  
233 power only  $\sqrt{n}$  times higher than the one used for single cell excitation, which would have otherwise  
234 required  $n$  times higher power for conventional parallel illumination approaches.  
235 Importantly, Multi-S/P FLiT can be adapted to other cyclic illumination configurations. For instance,  
236 photostimulation protocols using low frequency,  $1/T_p$ , (10-30 Hz) photostimulation train composed

237 of short (5-10 ms) illumination pulses,  $t_p$ <sup>15,25,26</sup>, can be equally performed using FLiT and sequential  
238 illumination of  $T_p/t_p$  tiled holograms, each for a time  $t_p$  (in the approximation of a switching time  $t$   
239  $\ll t_p$ ). This will enable to increase by  $T_p/t_p$  the number of excited cells without incrementing the  
240 illumination power or the illumination period  $T_p$  (Supplementary Fig.14).

241

### 242 **Rise of temperature under light-driven neuronal control with FLiT**

243 Here we demonstrated another important property of FLiT illumination: the capability to minimize  
244 the light induced temperature rise for multi-target illumination.

245 To this end, we simulated the temperature rise under different illumination conditions using a  
246 previously validated heat diffusion model<sup>22,23</sup>. Firstly, we used the model to predict the temperature  
247 changes produced by 100 spots randomly distributed in a volume of  $200 \times 200 \times 500 \mu\text{m}^3$  (Fig.5A)  
248 under typical illumination conditions for *in vivo* 2P optogenetics, i.e.,  $P_{std} = 20 \text{ mW}$  per cell and  $t_{std} =$   
249 5 ms. To minimize thermal crosstalk, we generated the 100 spots at an average position that  
250 enabled to maximize their relative distance. This, for a  $200 \times 200 \times 500 \mu\text{m}^3$  FoE, corresponded to  
251  $50.7 \pm 6.8 \mu\text{m}$  (Supplementary Fig.15A). The predicted temperature rise on the hottest spot was  $\sim 3$   
252 times higher than the case of an isolated target (Fig.5C, Fig.5E and Supplementary Movie 2).

253 Next, we compared these findings with the case where the same 100 targets were illuminated  
254 through the sequential generation of  $n$  subsets of spots by keeping the same excitation conditions  
255 (i.e.,  $P_{std} = 20 \text{ mW}$  per target and  $t_{std} = 5 \text{ ms}$  per subset). We considered two cases with sequential  
256 illumination of  $n = 4$  and  $n = 10$  holograms, each encoding for 25 or 10 spots, respectively (Fig.5B).  
257 Reducing the number of spots per hologram enables to further increase their average distance to  
258  $78.7 \pm 14.6 \mu\text{m}$  and  $106.0 \pm 23.7 \mu\text{m}$  (Supplementary Fig.15B-C), and thus reducing of nearly 8% and  
259 30% the corresponding maximum temperature rise in the hottest spot (Fig.5C, Fig.5F-G,  
260 Supplementary Fig.16 and Supplementary Movie 2). Delaying the sequential illumination by few  
261 milliseconds did not present significant variations in temperature rise compared to the previous  
262 conditions (Supplementary Fig.17). Whilst here, we have shown how to generate 100 spots in a  $200$   
263  $\times 200 \times 500 \mu\text{m}^3$ , the concept can be extended to arbitrarily larger FoE, and correspondingly larger  
264 numbers of spots, provided that the average distance is maintained.

265 Notably, here we have chosen a relative short illumination time. Longer illumination times (10-30  
266 ms) will considerably lengthen the thermal diffusion length and the maximum temperature rise so  
267 that the gain in using FLiT will be even more evident.

268 Similar reduction on the temperature rise, with no elongation of the total experimental time ( $t_{exp} =$   
269  $t_{std} = 5 \text{ ms}$ ), can be reached if the same holograms are illuminated with cyclic illumination by using  
270 Multi-S/P FLiT. In this case, we increased the excitation power per spot to  $\sqrt{n} \cdot 20 \text{ mW}$  and used



271  $t_{cyc} = 50 \mu s$ . Notably, cyclic illumination reduces the average temperature rises of nearly 40% and  
272 50% for  $n=4$  and  $n=10$ , respectively (Fig.5D, Fig.5H-I, Supplementary Movie 3 and Supplementary  
273 Fig.16) and also minimizes the temperature rise for single spot excitation.

274 These results show that using hybrid serial parallel photostimulation strategies (S/P FliT or Multi S/P  
275 FliT) for multi target illumination enable minimize temperature crosstalk among the multi-targets  
276 reaching a local temperature rise comparable to the case of an isolated target.

277

## 278 **DISCUSSION:**

279

280 Optical control of multiple neurons requires holographic light multiplexing through the use of LC-  
281 SLMs either coupled with spiral scanning or with parallel illumination<sup>3,17</sup>. In these configurations, the  
282 temporal resolution for sequential light patterning is limited by the LC refresh rate (60-500 Hz) to 2-  
283 20 ms. Moreover, although optical generation of a single neuronal spike using powers close to opsin  
284 saturation can be reached with illumination times  $\leq 1 \text{ ms}$ <sup>11,24,27,28</sup>, reaching optimal axial resolution  
285 requires working far from saturation<sup>25</sup> which typically lengthens the illumination time to 5-30 ms<sup>3</sup>,  
286 for single spike generation, or a few seconds for the generation of multiple spikes<sup>11</sup> or for neuronal  
287 inhibition<sup>10,29</sup>. These time values impose an extra temporal delay for sequential patterned  
288 illumination.

289 Holographic stimulation of multiple targets divides the laser output of high powerful lasers<sup>21</sup>  
290 among multiple targets which are simultaneously illuminated. This requires taking into account  
291 possible thermal photodamages<sup>22</sup> when designing the multi-site distribution. All in all, these  
292 limitations have so far restricted the maximum achievable number of targets for multi-targets 2P-  
293 optogenetics to a few dozen<sup>10,11,28</sup>.

294 Here, we have presented FliT, a new scheme for multi-target excitation which overcomes all these  
295 limitations by enabling kHz projection of multiple patterns and 20 (or more) times higher number of  
296 achievable targets with respect to previously proposed holographic approaches. We have  
297 demonstrated FliT illumination in two configurations S/P-FliT and Multi-S/P-FliT where the  
298 galvanometric mirror is moved across multiple vertically aligned holograms in custom made discrete  
299 time intervals or at continuous speed, respectively.

300 We have shown that S/P-FliT enables to control the relative spiking time among multiple cells (or  
301 groups of cells) with a temporal delay as short as 90  $\mu s$ , independently of the cell illumination dwell-  
302 time, opening the way to the investigation of synaptic integration, connectivity and neuronal coding  
303 with an unprecedented temporal precision. The ability to fast switch between multiple  
304 photostimulation patterns with sub-millisecond resolution will enable precise investigation of  
305 spatial-and time-dependent synaptic summation and integration of multiple and complex synaptic

306 inputs<sup>30</sup>. Being able to stimulate multiple specific subsets of neurons, with single cell precision,  
307 either simultaneously or with sub-ms custom temporal delays will be essential to precisely probe  
308 mechanisms such as spike-time dependent plasticity (STDP), where the temporal interval between  
309 pre-and-postsynaptic spikes are necessary to strengthen or depress synaptic connections<sup>31-34</sup>. For  
310 instance, S/P-Flit could be used to induce STDP in adjacent spines with sub-millisecond time  
311 intervals and investigate finely the role of such processes<sup>35</sup>. Notably, STDP plays an important role in  
312 building specific spatiotemporal patterns involved in temporal processing, and it has been shown to  
313 be the basis for learning and memory and is known to be involved in brain pathologies<sup>36,37</sup>.

314 Previous studies on mammalian neocortex have shown that optogenetic manipulation of small ( $\leq$   
315 30 cells) groups of neurons appears sufficient to impact behavioural responses<sup>11,12</sup> and most  
316 importantly that this can depend on the relative degree of synchronicity among the optically evoked  
317 spikes<sup>16,38</sup>. S/P-Flit has the potential to refine this type of studies by mimicking with unprecedented  
318 fine temporal precision a variety of physiological firing patterns and to manipulate them with  
319 different flavors, synchronizing or de-synchronizing them at will, while observing the effect of this  
320 time-controlled manipulation at different levels, from the local response of a neuronal circuit to  
321 behavioral responses and sensory perception, in both healthy and pathological brains.

322 Additionally, other brain regions with sparser connectivity and activation schemes might require the  
323 control of larger neuronal ensembles. For these studies, Multi-S/P-Flit, which enables to increase  
324 many folds the number of achievable targets, could be a crucial advance.

325 We have shown that Multi-S/P-Flit enables increasing  $n$  times the achievable number of targets,  
326 using  $\sim\sqrt{n}$  times less power than with conventional parallel illumination. This has two main  
327 implications: the possibility of using low power lasers and, for high energy laser, to reduce thermal  
328 photodamages as detailed below.

329 *In vivo* two photon optogenetics stimulation using mode locked Ti:Sapphire lasers (80 MHz) requires  
330 30-50 mW/cell<sup>29</sup>. Considering that at the wavelengths typically used for photostimulation (i.e., 900-  
331 950 nm) these sources can provide an output of a few W ( $\sim$ 200 mW after the objective), multi-  
332 target stimulation using those lasers remains limited to a few cells. Multi-S/P Flit thus re-opens the  
333 possibility of using conventional mode-locked lasers to reach several dozens of spots. It also enables  
334 excitation of blue shifted opsins (PsChR2<sup>38</sup>, TsChR2<sup>39</sup>, CoChR<sup>39</sup>) at their optimal photostimulation  
335 peak and to combine multi-target photostimulation of these opsins with red Ca<sup>2+</sup> imaging, which  
336 drastically reduces optical crosstalk from the imaging laser<sup>13,29</sup>.

337 *In vivo* activation of a single cell with spiral or parallel activation using low repetition (500 kHz-2  
338 MHz) fiber lasers ( $\sim$ 1030-1064 nm excitation wavelength) requires 2-50 mW/cell<sup>11,16,40,41</sup>.  
339 Considering that these lasers can deliver up to 60 W, it theoretically enables simultaneous

340 stimulation of hundreds of cells. It must however be taken into account that minimizing thermal  
341 damages<sup>22,23</sup> requires reducing the thermal crosstalk among the multi targets and imposes a minimal  
342 inter-spot distance (equal to the thermal diffusion length,  $l_{th} = \sqrt{6Dt}$ )<sup>22</sup>. In cortical mice brain, this  
343 has so far limited to 50 cells the number of achievable targets within a  $500 \times 500 \times 200 \mu\text{m}^3$   
344 excitation volume<sup>10</sup>. We have shown that this limit can be overcome by decomposing the multi-  
345 target distribution into  $n$  sub-groups of sparser targets (i.e., average distance between targets  $\gg l_{th}$ )  
346 sequentially or cyclically illuminated via S/P Flit or Multi S/P Flit. Sequential illumination via S/P Flit  
347 enables using the same excitation power per spot,  $P_{std}$ , as for the case of simultaneous illumination  
348 of the  $n$  sub groups but requires a  $n$  fold increase of the total experimental time. Cyclic illumination  
349 via Multi S/P requires increasing  $P_{std}$  by  $\sqrt{n}$  times while keeping the same total experimental time. In  
350 both cases the maximum temperature rise achieved is significantly reduced.

351 We have demonstrated the use of Flit for fast multi-cell optical stimulation. A similar approach can  
352 also be used for fast imaging approaches. Cohen et al.<sup>42</sup> have used a gaussian beam focused with a  
353 cylindrical lens on an LC-SLM addressed with multiple tiled holograms each encoding for a specific  
354 x,y position thus achieving 2D ultrafast scanning of a diffraction limited spot. The Flit approach will  
355 enable the generation of single or multiple shaped temporally focused spots for fast multi-target  
356 imaging using e.g. voltage indicators, or for fast compressive multiphoton imaging<sup>43</sup>. Also, the  
357 possibility to rapidly switch between different holograms each introducing different defocusing  
358 effects can be exploited for fast repositioning of the imaging focus and ultrafast fast volumetric  
359 imaging<sup>5,44</sup>.

360 We have shown that we can tile the LC-SLM with up to 20 independent tiled holograms without a  
361 deterioration of spot quality or axial resolution. This number can be increased by including a de-  
362 scanning unit, so that each scanned hologram is projected at the centre of the objective back  
363 aperture independently of its position on the LC-SLM. This will enable to eliminate the axial tilt and  
364 intensity losses for spots generated with distal holograms. Using a lens with a shorter focal length  
365 before the LC-SLM will reduce the vertical dimension of the chirped lines on the LC-SLM and limit the  
366 losses in intensity and ellipticity observed when using  $n \geq 20$  holograms. This, eventually combined  
367 with LC-SLMs with larger pixel numbers, will enable to combine the fine temporal resolution of S/P  
368 Flit with the multi-target capability of Multi-Flit to control at fine time scale large neuronal  
369 ensembles.

370 In the present design, the incoming illumination has been shaped in the form of a gaussian beam.  
371 Alternatively holographic light shaping could also be used<sup>45</sup> with the advantage of generating spots  
372 of variable size and shape. However, in this case, a full-frame illumination is expected in the Fourier

373 plane of the grating (i.e., on the multiplexing LC-SLM). Hence it would be necessary to introduce an  
374 additional asymmetric focusing unit (e.g., a cylindrical lens) in order to produce tiled illuminations.

375 The switching unit here adopted relies on a GM. Different types of scan unit, such as polygonal  
376 scanners or AODs could be incorporated to further improve the speed of the switch between light  
377 patterns.

378 In conclusion FLiT illumination is a new tool for the investigation of neuronal circuits with a sub-  
379 millisecond control, at single or large neuronal population scales. Combining all the aspects of FLiT  
380 presented here, together with the latest engineered fast activity sensors, will allow an all-optical  
381 interrogation and manipulation of brain activity to decipher how specific spatio-temporal patterns  
382 produced on user defined neuronal ensembles influence specific behaviors, cognitive tasks or  
383 defined pathological conditions.

384

385

### 386 **Acknowledgments**

387 We thank Florence Bui and Valeria Zampini for helping with stereotaxic injections and Imane  
388 Bendiffallah with organotypic cultures. We thank Dimitrii Tanese for helpful discussion on the  
389 modeling of opsin photocycles. We thank Ruth Sims for proof reading of the manuscript, Vincent de  
390 Sars for helpful discussion for the implementation of holographic algorithm in Python, Hillel Adesnik  
391 for providing the opsin ST-Chrome. We thank the IHU FOrESIGHT grant (Grant P-ALLOP3-IHU-000),  
392 the Fondation Bettencourt Schueller (Prix Coups d'élan pour la recherche française), the Getty Lab,  
393 the National Institute of Health (Grant NIH 1UF1NS107574 - 01), the Axa research funding and ERC  
394 advanced Grant HOLOVIS for financial support.

395

396 **MATERIALS AND METHODS:**

397 Optical Setup

398 The optical system was built around a commercial upright microscope (Olympus BX51WI) placed on  
399 a XY stage for sample displacement (Luigs & Neumann, V380FM). A femtosecond pulsed beam  
400 delivered by a diode pumped, fiber amplifier system (Amplitude Systèmes, Goji HP; pulse width 150  
401 fs, tunable repetition rate 10–40 MHz, maximum pulse energy 0.5  $\mu$ J, maximum average power 5 W,  
402 wavelength  $\lambda = 1030$  nm) operated at 10 MHz, was sent first through a  $\lambda/2$  wave retarder (Thorlabs,  
403 690-1200 nm, AQWP05M-980) in combination with a polarizer cube (CVI Melles Griot) for a manual  
404 control of the laser power. The beam was then demagnified with a telescope ( $f_1 = 100$  mm; AC508-  
405 100-B, Thorlabs;  $f_2 = 50$  mm, AC508-50-B, Thorlabs) and sent through an acousto-optic modulator  
406 (AOM) (Opto-Electronic, France) to drive fast and precise light power control. The first diffracted  
407 order was projected on a pair of XY GMs (3 mm aperture, 6215H series; Cambridge Technology) with  
408 a de-magnifying telescope ( $M=0.4$  magnification). Only the Y GM was used and driven by a servo  
409 driver (Cambridge Technology, MicroMax series 671). The GM plan was conjugated to a reflective  
410 dispersion grating of 800 l/mm by means of a telescope ( $f = 250$  mm; AC508-250-B, Thorlabs;  $f = 500$   
411 mm, AC508-500-B, Thorlabs). A lens ( $f = 500$  mm, Thorlabs, AC508-500-B) transmitted the resulting  
412 spatially chirped beam on the sensitive area of a reconfigurable liquid-crystal-on-silicon LC-SLM  
413 (LCOS-SLM X10468-07, Hamamatsu Photonics, resolution 800 $\times$ 600 pixels, 20  $\mu$ m pixel size), located  
414 in the Fourier plane of the diffraction grating. The LC-SLM was finally conjugated to the back focal  
415 plane of the microscope objective (Olympus LUMPlanFL 60XW NA 0.9) via a telescope ( $f = 1000$  mm;  
416 AC508-1000-B, Thorlabs;  $f = 500$  mm, AC508-500-B, Thorlabs).

417 The LC-SLM was divided in  $n$  horizontal tiles, each independently configurable. Each tiled hologram  
418 could be encoded with different sets of 3D diffraction-limited spots enabling to multiplex the  
419 temporally focused gaussian beam in multiple targeted locations on the sample. The phase profile of  
420 each  $n$  zones was independently calculated with a weighted Gerchberg and Saxton Algorithm<sup>46</sup>. The  
421 effect of the zero order in the sample was suppressed by introducing a cylindrical lens in front of the  
422 LC-SLM as detailed in<sup>47</sup>. Each tile of the LC-SLM was illuminated by deflecting the GM of a certain  
423 angle, corresponding to a precise driven voltage. A calibration was done in order to associate the  
424 beam position on the LC-SLM and the voltage to be applied on the GM.

425 During S/P-FLiT experiments for sub-ms desynchronization of pairs of neurons, the AOM and GMs  
426 was driven with a Digidata 1440A interface and pClamp software (Molecular Devices). In S/P-FLiT  
427 experiments for mimicking of random spike patterns and Multi-S/P-FLiT experiments, the system  
428 was controlled with a digital-analog converter board (National Instrument, USB-6259). The control of  
429 the system was fully automatized through a homemade software written in Python 3 and using the

430 open graphic library PyQt5 which allowed automatic calculation of the tiled holograms and control  
431 of the the GM rotation and AOM attenuation.

432

#### 433 Optical Characterization of Two-Photon Excitation

434 In order to characterize system performance, 2PE holographic fluorescence patterns were collected  
435 by exciting a thin ( $\sim 1 \mu\text{m}$ ) spin-coated layer of rhodamine-6G in polymethyl methacrylate 2% w/v in  
436 chloroform. Holographic patterns were projected on the sample plane through an excitation  
437 objective (Olympus LUMPlanFL 60XW NA 0.9). Images were collected by an opposite imaging  
438 objective (Olympus LUMPlanFL 60XW NA 0.7) in transmission geometry and detected by a CCD  
439 camera (pco, panda 4.2 bi). A short-pass filter rejected laser light (Chroma Technology 640DCSPXR;  
440 Semrock, Brightline Multiphoton Filter 680/sp). 3D stacks were collected by maintaining the  
441 excitation objective in a fixed position and moving the imaging objective along z direction with  $1 \mu\text{m}$   
442 steps by means of a piezoelectric motor (MIPOS100, Piezosystem Jena).

443 Axial distribution of intensity on different spots was measured by integrating the pixel intensity  
444 across circular region of observations (ROIs) around the spots in each z plane. Each axial intensity  
445 distribution was fitted with a Lorentzian model. The intensity and axial resolution for each spot was  
446 evaluated and reported as maximum intensity and Full Width Half Maximum (FWHM) of the fitted  
447 curves, respectively. Images were analyzed with ImageJ and 3D rendering was performed by Imaris.  
448 Axial resolution of in-focus spots was measured by averaging the axial resolution of individual spots  
449 distributed in a two-dimensional 5x5 spots matrix in the field of excitation of each tiled hologram ( $30$   
450  $\mu\text{m}$  inter-spots distance) as depicted in Supplementary Fig.4. In-focus intensity homogeneity of each  
451 FoE was measured by generating two-dimensional groups of 10 spots randomly distributed in the  
452 FoE of each tiled hologram. The axial resolution of spots distributed in a 3D volume was obtained by  
453 averaging the axial resolution of groups of 8 spots randomly distributed in a  $120 \times 120 \times 70 \mu\text{m}$  for each  
454 tiled hologram. The same groups of spots were used to measure the 3D intensity homogeneity of  
455 the different tiled holograms.

456

#### 457 Characterization of the switching time between tiles of the LC-SLM

458 We characterized the switching time to reposition the beam on different tiles of the LC-SLM by  
459 means of a photodiode as schematized in Fig.2.

460 First, we measured the time needed to switch between adjacent tile  $i$  and tile  $i+1$  of the LC-SLM  
461 subdivided in 20 holograms. For that, we generated two distinct phase masks,  $\varphi_i$  and  $\varphi_{i+1}$ , each  
462 encoding for an individual spot placed in a specific XY location of the focal plane. We positioned the  
463 photodiode (PD) in a conjugated plane of the sample and we aligned it such that the spot illuminates

464 the center of the detector. We displayed  $\varphi_i$  on the tile  $i$  and we recorded the light intensity on the  
465 PD, while driving the GM servo with a single-step voltage pulse (pulse width 1s) which deflect the  
466 beam across small angles between tile  $i$  to tile  $i+1$ . We repeated the same procedure by displaying  
467  $\varphi_{i+1}$  on tile  $i+1$ . From these two measurements, we obtained the averaged switching time to move  
468 between two consecutive tiled holograms in opposite directions, as the time taken for the signal to  
469 rise/fall between 3% and 97% of the maximum intensity. Of note, the position of PD was finely  
470 adjusted to maximize the photon counting when the GM was stationary positioned on tile  $i$  or tile  
471  $i+1$ .

472 Second, we measured the minimal switching time between holograms when sequentially scanning at  
473 constant rate all holograms. We generated a hologram  $\varphi_i$  on a single tile  $i$  encoding for an individual  
474 spot detected by the PD as previously described. We then recorded the light intensity on the PD,  
475 while driving the GM servo with a staircase voltage pulse (pulse time interval 50 $\mu$ s) which deflects  
476 the beam across wide angles between tile 1 to tile 20. From that, we measured the beam dwell-time  
477 on hologram  $\varphi_i$  during switch between hologram  $\varphi_1$  and hologram  $\varphi_{20}$ . We repeated the same  
478 procedure for all 20 holograms. From that, we measured the beam dwell-time on each tiled  
479 hologram during whole scan of all holograms at constant switch rate. Of note, scan of all holograms  
480 would be alternatively possible by driving the GM with a single-step voltage facilitating maximum  
481 speed deflection of the beam across wide angles between tile 1 to tile 20. While that can facilitate  
482 shorter dwell-time per hologram, it also gives variable dwell-time per holograms as central tiled  
483 holograms feature shorter illumination dwell-times compared to distal tiled holograms as mirror  
484 reaches maximum speed at the midpoint.

485

#### 486 Animals

487 All procedures involving animals were in accordance with national and European (2010/63/EU)  
488 guidelines and were approved by the authors' institutional review boards and national authorities  
489 (French Ministry of Research, protocol ID: 02230.02). Experiments were performed on C57BL/6J  
490 male mice (Jackson lab.) reared in a 12 hr light/dark cycle with food ad libitum. All efforts were made  
491 to minimize suffering and reduce the number of animals.

492

#### 493 In Vivo Viral Expression

494 Stereotaxic injections of the fast somatic opsin ST-ChroME were performed in 3-week-old male mice.  
495 Mice were anesthetized with ketamine (80 mg/kg)–xylazine (5 mg/kg) solution and a small  
496 craniotomy (0.7 mm) was made on the skull overlying V1 cortex. Injection of 1 $\mu$ l of solution  
497 containing the viral vector was made with a cannula at a rate of 80-100 nl/min and 200-250  $\mu$ m

498 below the dural surface. We used a viral mixture containing the somatic opsin ST-Chrome (AAV9-  
499 hSyn-DIO-Chrome-Flag-ST-P2A-H2B-mRuby-WPRE-SV40, from the Adesnik lab, Berkeley, viral titer of  
500  $5.86 \times 10^{13}$  particles/ml) and the Cre recombinase (AAV9-hSyn-Cre, from Addgene,  $3.3 \times 10^{13}$  p/ml),  
501 diluted at a factor 10 and 100 respectively, in fresh NaCl solution. The craniotomy and the skull were  
502 then sutured and the mouse recovered from anesthesia. After 2-3 weeks, sufficient for an adequate  
503 expression of the virus, mice were used for electrophysiological experiments. ST-Chrome expression  
504 in acute cortical slices is shown in Supplementary Fig.6A.

505

#### 506 Preparation of Organotypic Cultures and Viral Infection

507 Hippocampal slices cultures were prepared from postnatal day 6-9 mice pups according to the  
508 interface culture method<sup>48</sup>. Briefly, hippocampi were gently detached from the brain and placed in a  
509 cold dissecting medium composed of: Gey's Balanced Salt Solution (Sigma G9779), supplemented  
510 with 25 mM D-glucose, 10 mM HEPES, 1 mM Na-Pyruvate, 0.5 mM  $\alpha$ -tocopherol, 20 nM ascorbic  
511 acid and 0.4% penicillin/streptomycin (5000 U/mL; Fisher 11528876). Transverse slices of 300  $\mu$ m  
512 thickness were cut using a McIlwain tissue chopper, maintained for at least 1h at 4°C and then  
513 transferred onto semiporous membranes inserts (47 mm diameter, 0.45  $\mu$ m pore size; Millipore  
514 FHLPO4700) which were placed in six well tissue culture plates containing 1.1 ml medium per well.  
515 The incubation medium consisted in: 50% Opti-MEM (Fisher 15392402), 25 % heat-inactivated horse  
516 serum (Fisher 10368902), 24% HBSS (Fisher 15266355), 1% penicillin/streptomycin (5000U/mL), and  
517 supplemented with 25 mM D-glucose, 1 mM Na-Pyruvate, 20 nM ascorbic acid and 0.5 mM  $\alpha$ -  
518 tocopherol. Slices were maintained at 34°C in an incubator with 5% CO<sub>2</sub>. After 3 days, the medium  
519 was replaced with a fresh and warm Neurobasal culture medium composed of: 2% Neurobasal-A  
520 (Fisher 11570426), 15% heat-inactivated horse serum, 2% B27 supplement (Fisher 11530536), 1%  
521 penicillin/streptomycin (5000U/mL), and supplemented with 0.8 mM L-glutamine, 0.8 mM Na-  
522 Pyruvate, 10 nM ascorbic acid and 0.5 mM  $\alpha$ -tocopherol. This medium was changed every 2-3 days  
523 until the experiment.

524 Organotypic slices were then infected with 1  $\mu$ L of virus at 5-7 days in vitro (DIV). We used the same  
525 mixture as for in vivo stereotaxic injections. Slices were used for electrophysiology recordings at 12-  
526 14 DIV. See Supplementary Fig.6B for ST-Chrome expression in this preparation.

527

#### 528 Acute Slice Preparation for Electrophysiology

529 Acute parasagittal slices of the visual cortex were prepared from adult mice 2-3 weeks after viral  
530 injection. Animals were decapitated after being deeply anesthetized with isoflurane (5% in air). The  
531 brain was quickly removed, immersed in an ice-cold choline solution and 300  $\mu$ m-thick slices were



532 obtained using a vibratome (Leica Biosystems VT1200S). The cutting solution contained the following  
533 (in mM): 126 choline chloride, 16 glucose, 26 NaHCO<sub>3</sub>, 2.5 KCl, 1.25 NaH<sub>2</sub>PO<sub>4</sub>, 7 MgSO<sub>4</sub>, 0.5 CaCl<sub>2</sub>, pH  
534 7.4, cooled to 4°C and equilibrated with 95% O<sub>2</sub>/5% CO<sub>2</sub>. Slices were maintained at 32°C for 20min in  
535 standard ACSF (sACSF) containing the following (in mM): 125 NaCl, 2.5 KCl, 26 NaHCO<sub>3</sub>, 1.25  
536 NaH<sub>2</sub>PO<sub>4</sub>, 1 MgCl<sub>2</sub>, 1.5 CaCl<sub>2</sub>, 25 glucose, and 0.5 ascorbic acid, pH 7.4, saturated with 95% O<sub>2</sub> and  
537 5% CO<sub>2</sub> and then transferred at room temperature in the same solution until recordings.

538

#### 539 Whole-Cell Electrophysiology In Vitro

540 Acute slices as well as organotypic slices were placed in a recording chamber under the microscope  
541 objective, and perfused continuously with fresh sACSF saturated with 95% O<sub>2</sub> and 5% CO<sub>2</sub>. Neurons  
542 were patched at 30-60 μm from the slice surface. Single or double-patched neurons were clamped  
543 at -70 mV in voltage-clamp configuration and membrane potential was kept at -70 mV with currents  
544 injections in current-clamp configuration. Patch electrodes (Borosilicate glass pipette, outer  
545 diameter 1.5 mm and inner diameter 0.86 mm, Sutter Instruments) were filled with an intracellular  
546 solution containing the following (in mM): 127 K-gluconate, 6 KCl, 10 Hepes, 1 EGTA, 2 MgCl<sub>2</sub>, 4 Mg-  
547 ATP, 0.3 Na-GTP; pH adjusted to 7.4 with KOH. The estimated reversal potential for chloride (E<sub>Cl</sub>) was  
548 approximately -69 mV based on the Nernst equation. Pipettes were pulled from borosilicate glass  
549 capillaries and had a typical tip resistance of 5-6 MΩ. The averaged series resistances were 18.5 ± 7.9  
550 MΩ (n = 34 cells) and 17.9 ± 3.7 MΩ (n = 8 cells), for acute slices and organotypic cultures,  
551 respectively. The following receptor blockers were added to the sACSF to block any synaptic effect:  
552 DNQX and AP-5 (1 μM each; from Abcam). Electrophysiology data were acquired with a Multiclamp  
553 700B amplifier and digitized with a Digidata 1322A interface and pClamp software (Molecular  
554 Devices). Signals were sampled at 20–50 kHz and filtered at 4-10 kHz.

555

#### 556 Desynchronization of Activity of distinct neurons

557 In S/P-FliT experiments, we desynchronized two ST-Chrome-expressing targeted neurons, here  
558 called neuron A and neuron B (Fig.3A). The following photostimulation procedure was used in order  
559 to trigger activity in neuron A and B with a time delay shorter than the illumination dwell-times  
560 needed to evoke activity in the two neurons. We defined three tiled phase masks and we vertically  
561 piled them adjacently on the LC-SLM display such that: tile  $\varphi_A$  encodes for illumination of neuron A  
562 (top tile), tile  $\varphi_{AB}$  encodes for simultaneous illumination of neurons A and B (middle tile), and tile  $\varphi_B$   
563 encodes for illumination of neurons B (bottom tile). First, we established threshold light powers  $P_A$   
564 and  $P_B$ , and illumination dwell-times  $t_A$ ,  $t_B$  to independently evoke an AP on neuron A and neuron B,  
565 by deflecting the GM on tile  $\varphi_A$  and  $\varphi_B$ . Threshold values were defined in current clamp mode when

566 AP was reliably generated on 3/3 consecutive trials (40 s inter-time between trials). Photocurrents  
567 corresponding to threshold illumination conditions were also recorded in voltage-clamp. On the  
568 basis of these values, we set a sequence to drive the GM and the AOM and introduce arbitrarily  
569 defined spike delays  $\delta t$  between neuron A and B. Accordingly, the beam was sequentially directed by  
570 tilting the GM on tile  $\varphi_A$  for a time  $\delta t$ , on tile  $\varphi_{AB}$  for a time  $t_A - \delta t$  and on tile  $\varphi_B$  for a time  $t_B -$   
571  $(t_A - \delta t)$ . The incoming power was adjusted via the AOM such that it was set to  $P_A$  when the beam  
572 was on tile  $\varphi_A$ , to  $P_B$  when the beam was on tile  $\varphi_B$  and to  $P_A + P_B$  when the beam was on tile  $\varphi_{AB}$ . Of  
573 note, the diffraction efficiency of phase mask  $\varphi_{AB}$  was computationally corrected such that the ratio  
574 of intensity sent onto neuron A and B equals to  $P_A/P_B$ . That ensures that both neurons are  
575 constantly illuminated with the same intensity during their respective illumination dwell-time.  
576 Importantly, in voltage-clamp mode, we verified that the beam of power  $P_A + P_B$  positioned on  $\varphi_{AB}$   
577 for a time  $t_A$  and  $t_B$  elicited the same photocurrents previously elicited by illuminating only neuron A  
578 (with  $P_A$  power,  $t_A$  dwell-time on  $\varphi_A$ ) and B (with  $P_B$  power,  $t_B$  dwell-time on  $\varphi_B$ ), respectively  
579 (Supplementary Fig.18). GM deflection between the three tiles was driven with small angle single-  
580 step voltage as previously detailed. We thus recorded in current-clamp the APs driven in neuron A  
581 and B by addressing GM and AOM following the established sequence of photoactivation.  
582 Of note, in general, for all those experiments which feature delays longer than the illumination  
583 dwell-times needed to evoke activity in the two neurons, only two tiles of the LC-SLM are necessary  
584 (tile  $\varphi_A$  and tile  $\varphi_B$ ), as the beam will never be simultaneously on neuron A or B.  
585 Importantly, this strategy can be generalized to desynchronize  $n$  neurons (or  $n$  groups of neurons)  
586 with delays inferior to each activation dwell-time, by dividing the LC-SLM in  $2n - 1$  tiled holograms  
587 and piling them on the LC-SLM such that each hologram encodes, from top to bottom:  $1^{st}$  tiled  
588 hologram  $\rightarrow 1^{st}$  neuron,  $2^{nd}$  tiled hologram  $\rightarrow 1^{st}+2^{nd}$  neurons,...,  $n^{th}$  tiled hologram  $\rightarrow 1^{st}+2^{nd}+...+n^{th}$   
589 neurons,  $(N+1)^{th}$  tiled hologram  $\rightarrow 2^{nd}+...+n^{th}$  neurons,  $(n+2)^{th}$  tiled hologram  $\rightarrow 3^{rd}+...+n^{th}$  neurons ...  
590  $(2n-1)^{th}$  tiled hologram  $\rightarrow n^{th}$  neuron. Power on each of the  $2n-1$  tiled phase masks needs to be  
591 modulated accordingly to the number of encoded targets (Supplementary Fig.8).

592

### 593 Mimicking of firing

594 In S/P FliT experiments aiming to mimic neuronal firing, reference traces originated from an  
595 individual recording under in-vivo patch-clamp. In particular, two subsections, each 2 s long and  
596 featuring characteristic firing patterns, were arbitrarily selected and delayed. The two traces were  
597 then feed to a home-made software which extracted the spike timing and automatically determined  
598 the illumination sequence (including illumination power and switch time) to be addressed on the

599 tiled holograms of the LC-SLM to reproduce the delayed spiking patterns on two double-patched  
600 neurons.

601

### 602 Multi-Neuron Activation

603 In Multi-S/P experiments, the LC-SLM was subdivided in  $n$  tiled phase masks. In particular, one mask  
604  $\varphi$  was encoded to illuminate one targeted ST-ChroME-positive neuron. We initially established  
605 threshold light power  $P_{std}$  and illumination dwell-time  $t_{std}$  to evoke an AP on the cell by tilting the GM  
606 to steadily illuminate  $\varphi$ .

607 The cell was then photoactivated under cyclic illumination by driving the GM with a staircase voltage  
608 input which facilitated steering the beam back and forth on all  $n$  holograms through discrete angle  
609 deflections and fixed dwell-time per hologram at  $t_{cyc} = 50\mu s$  for  $N_{cyc}$  cycles (Supplementary  
610 Fig.19). Compared to scan the holograms by driving the GM with a single-step voltage input,  
611 staircase voltage inputs gives more homogenous dwell-time per hologram.

612 We tested a slow photoactivation protocol featuring a total scan time  $t_{exp}^{cyc} = n \cdot N_{cyc} \cdot t_{cyc}$  and a  
613 fast photoactivation protocol featuring a total scan time  $t_{exp}^{cyc} = t_{std}$ . We established power to  
614 trigger an AP in both cases by varying the number of the tiled holograms (i.e., the size of each tiled  
615 hologram) between 12 and 50. Photocurrents have been recorded in voltage-clamp by displaying  $\varphi$   
616 on different position of the LC-SLM, in order to verify that different tiles substantially elicit the same  
617 photocurrent (Supplementary Fig.11).

618

### 619 Temperature Simulation:

620 The spatio-temporal distribution of the temperature rise was calculated by solving the Fourier heat  
621 diffusion equation<sup>49</sup> considering the brain tissue as an infinite medium with isotropic and uniform  
622 thermal properties as described in<sup>22</sup>. The solution is obtained by convolving the Green's function for  
623 the diffusion equation by the thermal source term, which is the thermalisation of the absorbed light  
624 source intensity. This model has been experimentally validated<sup>22</sup>. Numerical solution was  
625 implemented in Python, taking special care in selection spatial and temporal sampling to avoid  
626 overlap due to cyclic boundary conditions induced by the use of Fourier transform based numerical  
627 convolution.

628

### 629 Data Analysis and Statistical Tests

630 We performed the analysis of the recorded stacks on Rhodamine layers with MATLAB, ImageJ, and  
631 the Imaris software (Bitplane, Oxford Instruments). The 2PE fluorescence values for each spot were  
632 obtained by integrating the intensity of all the pixels in a circular area containing the spot, in the

633 plane where the intensity was at its maximum value (i.e., the TF plane). Axial intensity distributions  
634 were obtained by integrating the intensity of the pixels in the same area for each plane of the  
635 recorded stack, in a range of  $\pm 20 \mu\text{m}$  around the focal plane of each spot. Reported values for the  
636 axial confinement were the fit of the axial profile of the spots with a Lorentzian model and referred  
637 to the FWHM of the curves.

638 All electrophysiological data were analyzed with Clampfit (Molecular Devices). For S/P-FliT  
639 experiments (Fig.3), we measured, for double patched neurons, A and B, the depolarization onset or  
640 the AP peak delay, determined as the time between the beginning of the light stimulus and  
641 membrane potential change or the AP peak, respectively. We then subtracted the values of cell B to  
642 cell A and compared this temporal delay to the expected one. We evaluated the temporal accuracy  
643 as the difference between imposed  $\delta t$  and experimental  $\delta t_{AP}^{\text{exp}}$  delays,  $|\delta t_{AP}^{\text{exp}} - \delta t|$ . Global accuracy  
644 was calculated as weighted mean and SD of all imposed  $\delta t$ . For mimicking experiments, the analysis  
645 of the results was established by pairing the closest subsequent APs in the two neurons. In  
646 particular, for each AP pair, we evaluated the temporal accuracy as the difference between driven  
647 and experimental inter-spike time. We then calculated the overall accuracy of the mimicking by  
648 weight averaging the temporal accuracy of each AP pair.

649 AP latencies were determined as the time between the beginning of the stimulus and the time of AP  
650 peak, and AP jitters were calculated as the standard deviation (SD) of the AP latency accros trials. All  
651 recordings were analyses and averaged across 3-5 photostimulation trials. All values are presented  
652 as mean  $\pm$  SD of  $n$  experiments.

653  
654  
655  
656  
657  
658  
659

660 FIGURES

661

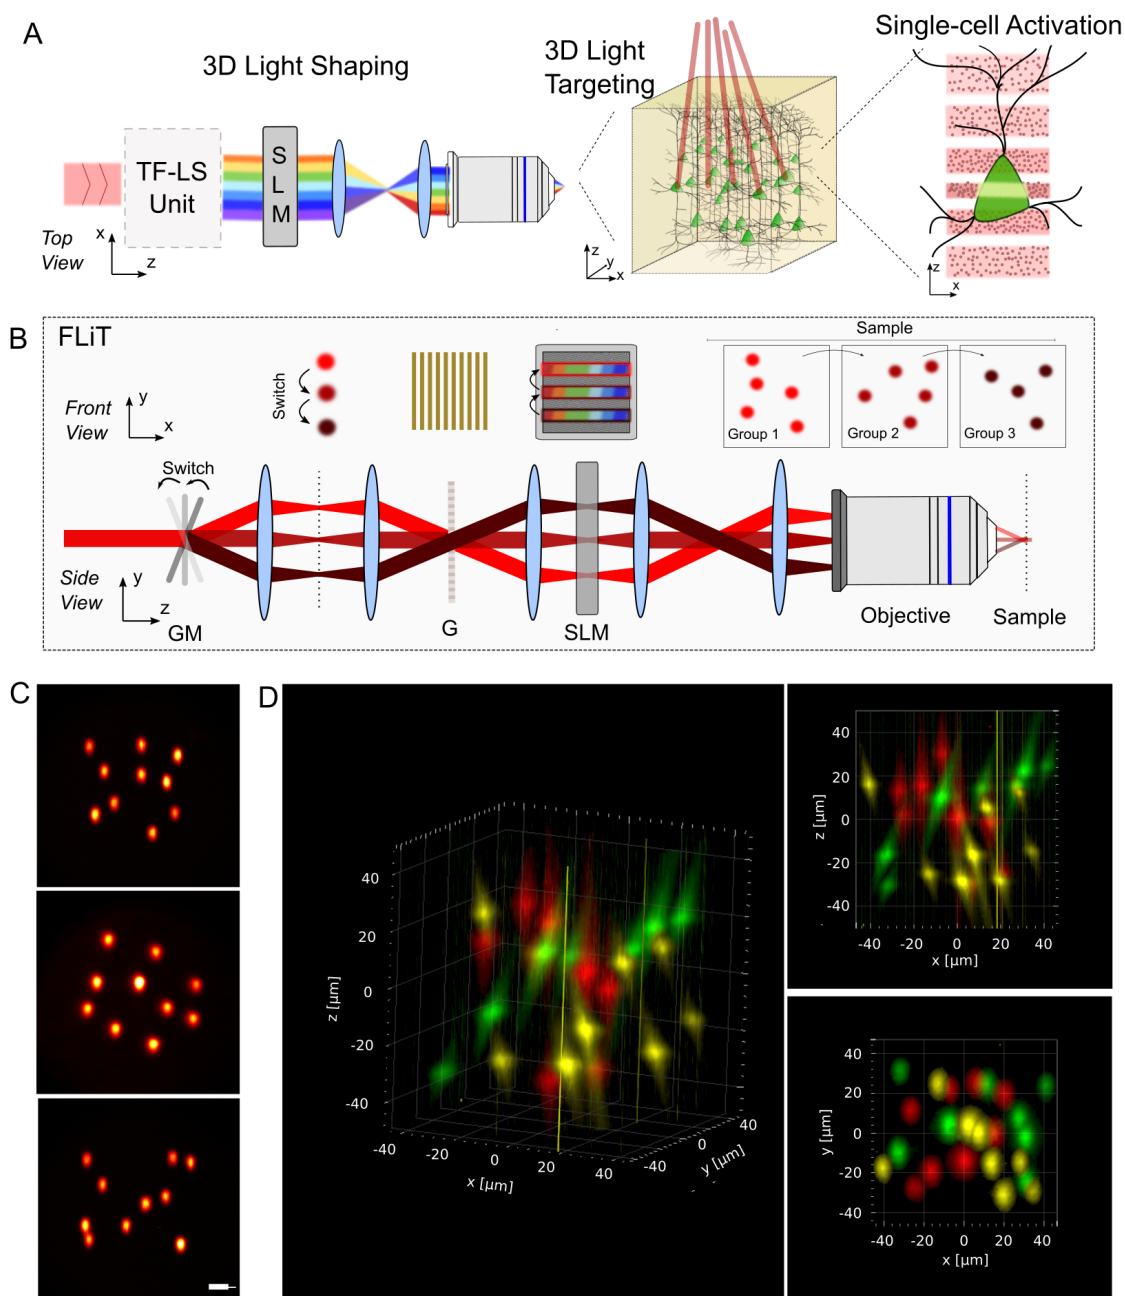

662

663

664 **Figure 1: FLiT optical characterization.**

665 **(A)** General optical scheme for temporally focused light shaping. A first light-shaping temporally  
666 focusing architecture (LS-TF) allows (i) sculpting light into particular forms and (ii) temporally  
667 focusing the photons to confine photostimulation to a shallow axial region with cellular dimensions.  
668 A subsequent LC-SLM modulation allows multiplexing the sculpted light to multiple 3D sample  
669 locations. **(B)** Optical setup of FLiT. A pulsed collimated beam (red line) is reflected by a

670 galvanometric mirror (GM) onto a diffracting grating (G) via a  $4f$ -telescope. Diffracted off the grating,  
671 the beam is collimated onto a liquid crystal spatial light modulator (LC-SLM) in the form of a  
672 horizontal (i.e., orthogonal to the orientation of the grating lines) spatially chirped strip of light. The  
673 LC-SLM is imaged onto the back aperture of an objective lens so that *ad hoc* phase-modulation on  
674 the LC-SLM allows multiplexing the initial beam and generating a multi-site temporally focused  
675 pattern of light in the sample. As deflection of the beam by the GM results into a translation of the  
676 illuminating bands on the LC-SLM (dark red lines), addressing the LC-SLM with  $n$  independent tiled  
677 holograms  $\varphi_i$  leads to fast switch of different groups of light patterns into the sample. The top and  
678 bottom drawing represents the XY and the YZ plane views, respectively. **(C)** x-y 2PE fluorescence  
679 cross-sections of different groups of randomly distributed spots generated in the sample focal plane  
680 by addressing the  $i$ -th hologram  $\varphi_i$  of an LC-SLM subdivided in 20 tiled holograms: hologram  $\varphi_8$   
681 (Top), hologram  $\varphi_{10}$  (Middle) and hologram  $\varphi_{12}$  (Bottom). Scale bar: 20 $\mu$ m. **(D)** 2PE fluorescence of  
682 different groups of spots generated by different tiled holograms  $\varphi_i$  randomly distributed across a  
683 120x120x70  $\mu$ m<sup>3</sup> volume. Different colors correspond to different tiled hologram (hologram  $\varphi_4$ ,  
684 yellow; hologram  $\varphi_{10}$ , red; and hologram  $\varphi_{16}$ , green).  
685  
686

687

688

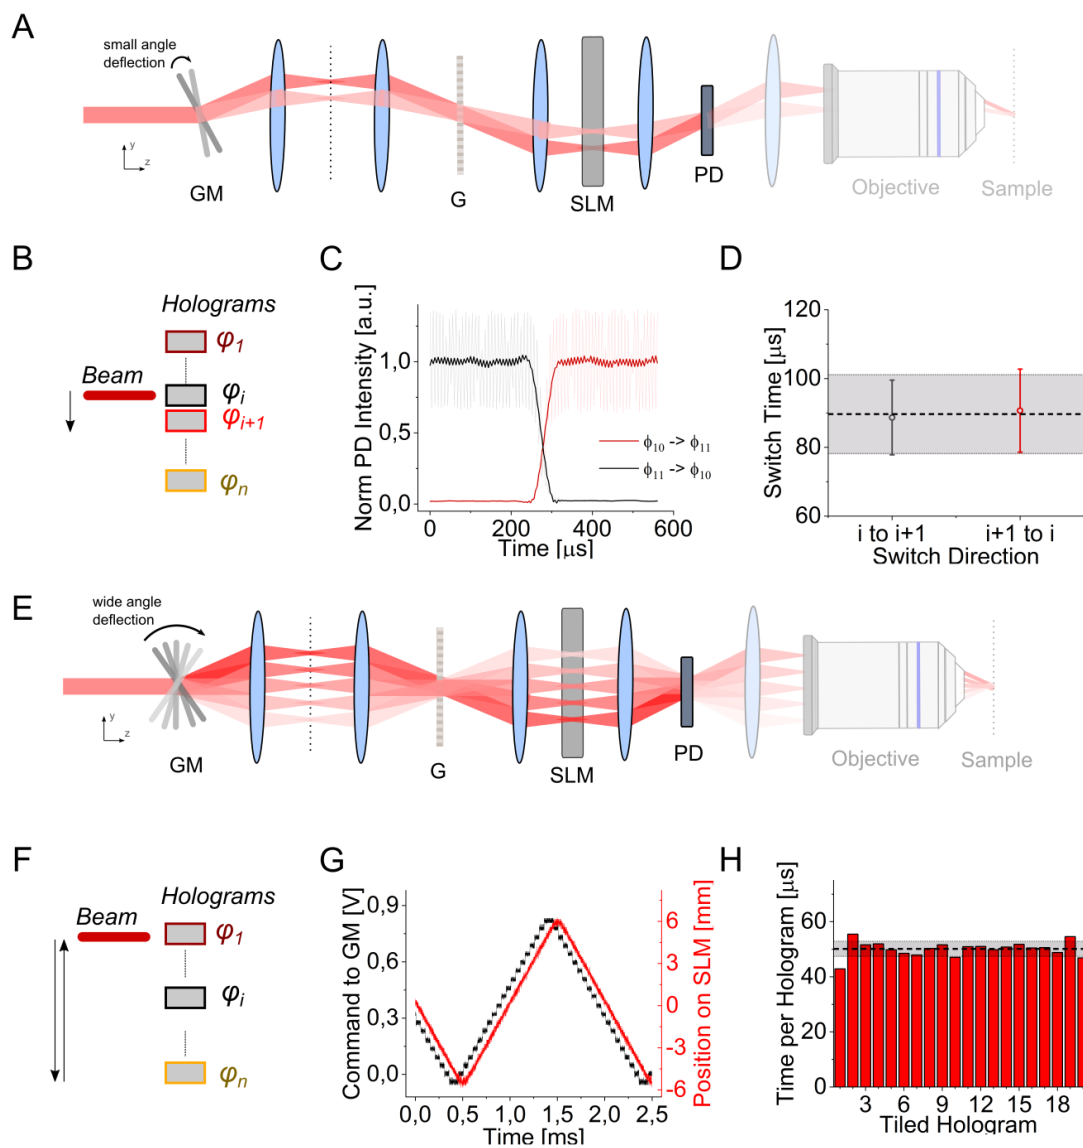

689

690

691 **Figure 2: FLiT switching time.**

692 (A) Switching time between two adjacent tiled holograms ( $\varphi_i$  and  $\varphi_{i+1}$ ) is measured by means of a  
 693 photodiode (PD) placed in an image conjugate plane while driving the galvanometric mirror (GM)  
 694 with small angles single-step voltage inputs. (B) Scheme of illumination switch between tiled  
 695 hologram  $\varphi_i$  and  $\varphi_{i+1}$  on the SLM display corresponding to sequence depicted in (A). (C)  
 696 Representative intensity response of the PD when GM is switched from hologram  $\varphi_{11}$  (encoding for  
 697 an individual spot in the middle of PD) to hologram  $\varphi_{10}$  (deviating the beam out of the PD) (*black*  
 698 *line*) or, vice versa, from hologram  $\varphi_{10}$  (encoding for an individual spot in the middle of PD) to  
 699 hologram  $\varphi_{11}$  (deviating the beam out of the PD) (*red line*). (D) Switch time calculated as the time  
 700 taken for the signal to rise/fall between 3% and 97% of the maximum intensity, when the spot is

701 encoded in hologram  $\varphi_i$  and GM is switched from hologram  $\varphi_i$  to  $\varphi_{i+1}$  (black symbols) or vice versa  
702 (red symbols). Horizontal black line and grey bands indicate the global mean and SD switching time,  
703 respectively. **(E)** Switch time to sequentially illuminate all holograms at constant rate from  $\varphi_1$  to  $\varphi_n$  is  
704 measured by driving the galvanometric mirror (GM) with a wide-angle staircase voltage input. **(F)**  
705 Scheme of the illumination switch to sequentially illuminate all holograms from  $\varphi_1$  to  $\varphi_n$  on the SLM  
706 display corresponding to the sequence depicted in (E). **(G)** GM voltage input (black line) and  
707 corresponding position of the incoming beam on the LC-SLM (red line) when GM is driven as  
708 depicted in (E). **(H)** Dwell time of each hologram  $\varphi_i$  of the LC-SLM while GM is driven as depicted in  
709 (E) and  $\varphi_i$  only encodes an individual spot in the middle of the PD. Horizontal black and grey lines  
710 indicate the mean and SD dwell-time over all holograms. For all experiments the LC-SLM was dived  
711 in 20 tiled holograms.  
712  
713



714  
715

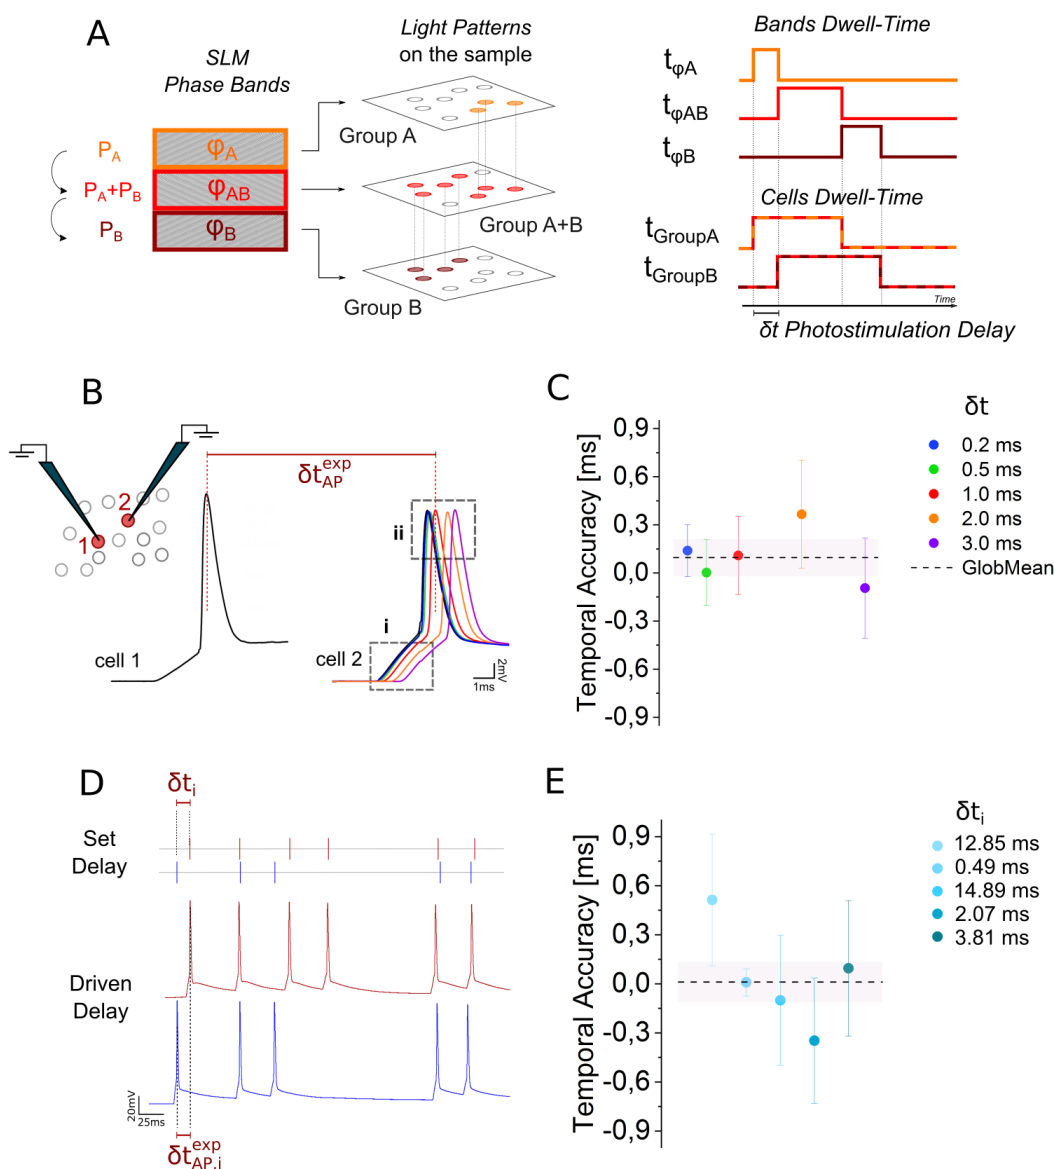

716  
717  
718

**Figure 3: Tuning control of neuronal activity in targeted neurons by S/P-FLiT.**

719 **(A)** Conceptual scheme of S/P FLiT. The LC-SLM is tiled in different regions each encoding different  
 720 phase masks. In the present example, phase mask  $\varphi_A$  and  $\varphi_B$  encode for group of spots A and B,  
 721 while phase mask  $\varphi_{AB}$  encodes for a comprehensive pattern including group A and group B. By  
 722 steering the beam vertically across the phase masks with predetermined dwell-times and  
 723 illumination intensities per each mask, it is possible to set arbitrary delays of activation between  
 724 groups of spots. In the illustrated example, the laser dwell-time is  $t_{\varphi_A}$ ,  $t_{\varphi_{AB}}$ ,  $t_{\varphi_B}$ , and the illumination  
 725 power is  $P_A$ ,  $P_A + P_B$ ,  $P_B$  on  $\varphi_A$ ,  $\varphi_{AB}$ ,  $\varphi_B$  respectively. Importantly on comprehensive phase mask  $\varphi_{AB}$ ,  
 726 the distribution of intensity must be computationally set to maintain an amount of power  $P_A$  and  $P_B$   
 727 on subgroup A and B, respectively. Overall, this scheme yields an activation time  $t_{\varphi_A} + t_{\varphi_{AB}}$  for group A,

728  $t_{\phi AB} + t_{\phi B}$  for group B and a delay of activation between group A and group B  $\delta t$  equivalent to  $t_{\phi A}$ . The  
729 scheme displayed is meant to represent  $n$  groups of spots; their number is here limited to 2 for  
730 presentation purposes only. **(B)** Representative light-driven APs from two double-patched ST-  
731 ChroME-expressing neurons by imposing different delays  $\delta t$  ranging from 0.2ms to 3ms. **(C)**  
732 Temporal accuracy calculated as the difference between imposed  $\delta t$  and experimental  $\delta t_{AP}^{exp}$  delays,  
733  $|\delta t_{AP}^{exp} - \delta t|$ . Circle symbols represent different  $\delta t$  delays (data are shown as mean  $\pm$  SD). Horizontal  
734 dashed black line and grey bands represents global mean and SD, respectively. Error bars are SD on  $n$   
735 = 12 pairs of cells. Mean AP accuracy is  $96 \pm 114 \mu s$ . **(D)** Representative light-driven APs from two  
736 double-patched ST-ChroME-expressing neurons (Bottom) by imposing a random spiking patterns  
737 (Top) featuring inter-spike time intervals  $\delta t_i$ . **(E)** Temporal accuracy calculated as difference  
738 between imposed  $\delta t_i$  and experimental  $\delta t_{APi}^{exp}$  delays of the  $i$ -th AP pair,  $|\delta t_{APi}^{exp} - \delta t_i|$ . Circles from  
739 light to dark blue indicate temporal accuracy from subsequent pairs of APs (data are shown as mean  
740  $\pm$ SD). Mean temporal accuracy is  $11 \pm 122 \mu s$  ( $n = 12$  pair of cells). Mean photostimulation power is  
741  $37.7 \pm 21.3$  mW. Illumination dwell-time ranges between and 2-5ms. 1030nm illumination has been  
742 used.  
743  
744

745

746

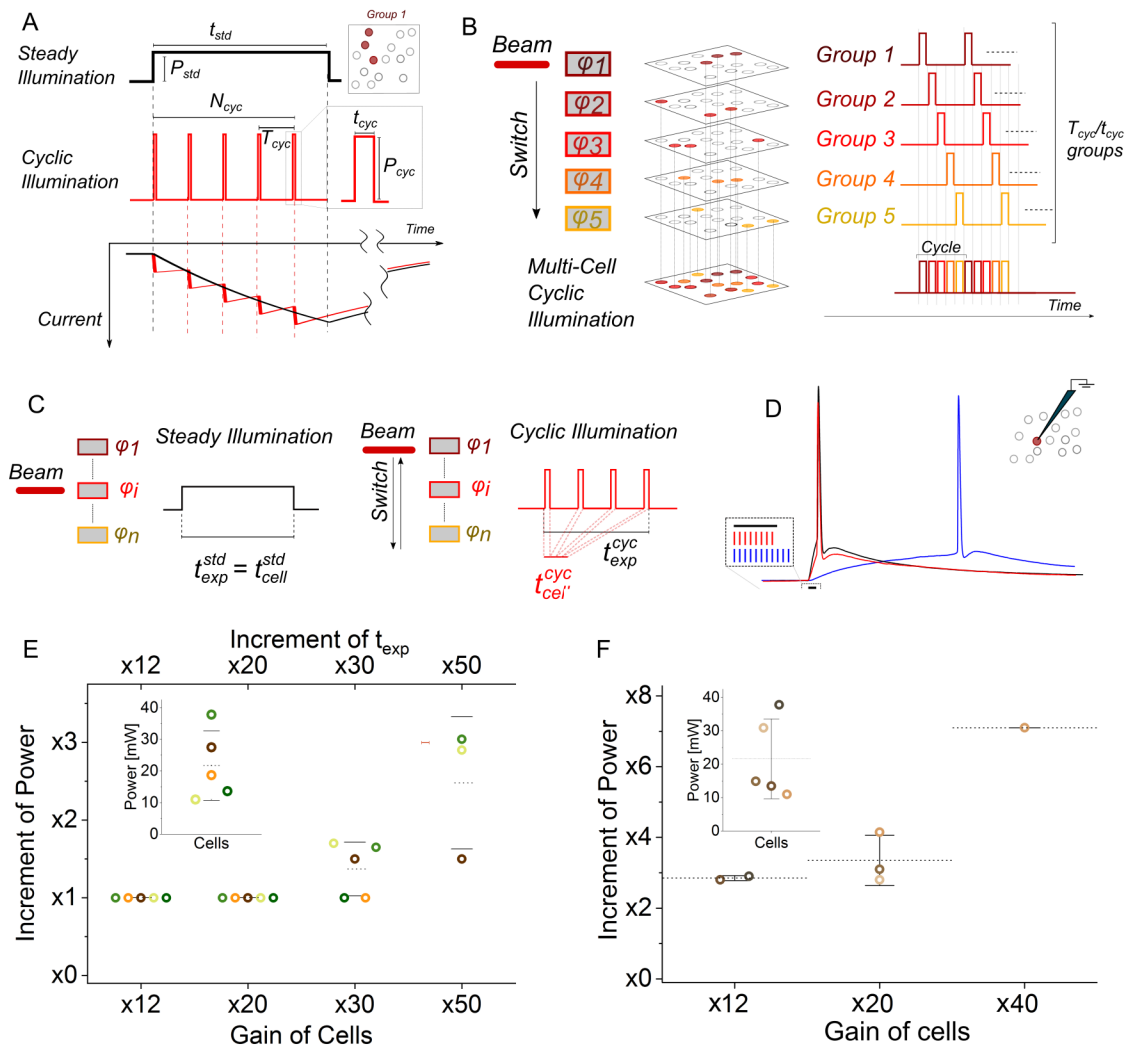

747

748

749 **Figure 4: Multi-cell activation by S/P-MultiFLIT.**

750 **(A)** Photostimulation of a group of neurons under steady and cyclic illumination. A soma-targeted

751 light pattern encoded by a single hologram can be used to photoactivate a group of neurons either

752 under steady illumination of power  $P_{std}$  and duration  $t_{std}$  (black line, *Top*) or under cyclic

753 illumination of power  $P_{cyc}$ , period  $T_{cyc}$  and pulse duration  $t_{cyc}$  over  $N_{cyc}$  cycles (red line, *Middle*).

754 Corresponding simulated photocurrents in an ST-ChroME-expressing neuron are shown under

755 steady (black) and cyclic (red) illumination when  $P_{cyc} = P_{std}\sqrt{T_{cyc}/t_{cyc}}$  ( $P_{std} = 0.05 \text{ mw}/\mu\text{m}^2$ ;

756  $P_{cyc} = 0.05\sqrt{20} \text{ mw}/\mu\text{m}^2$ ;  $T_{cyc} = 20t_{cyc}$ ;  $t_{cyc} = 50\mu\text{s}$ ; 1030nm) (*Bottom*). **(B)** Conceptual scheme

757 of simultaneous photostimulation of multiple groups of neurons under Multi-S/P scheme. The LC-

758 SLM is tiled in multiple holograms  $\phi_i$  (here from  $\phi_1$  to  $\phi_5$ ) each encoding for different soma-targeted

759 light-patterns illuminating different groups of cells (here from Group 1 to Group 5). The illumination

760 beam is switched across the holograms such that each hologram is sequentially illuminated with  
761 short pulses of light  $t_{cyc}$  and the same cyclic photoactivation process is enabled sequentially on the  
762 different light patterns. The scheme displayed is meant to represent  $n$  groups of spots; their number  
763 is here limited to 5 for presentation purposes only. **(C)** Scheme of the experiment. The SLM is  
764 subdivided in  $n$  tiled holograms, with tiled hologram  $\varphi_i$  encoding for a spot of light targeting a ST-  
765 ChromE-expressing patched neuron. The neuron is then activated either by steadily maintaining the  
766 laser beam on  $\varphi_i$  with laser power  $P_{std}$  (steady illumination) or scanning the beam over the SLM with  
767 laser power  $P_{cyc}$  (cyclic illumination). **(D)** Representative light-evoked APs under steady illumination  
768 of duration  $t_{std}=5ms$  (black line) and cyclic illumination with  $t_{exp}^{cyc} = t_{exp}^{std}$  (red line) or  $t_{cell}^{cyc} = t_{cell}^{std}$   
769 (blue line). Illumination last steadily 5ms (black bar) and cyclically 5ms (red bars) and 60ms (blue  
770 bars) **(E)** Gain of activable cells obtained in Multi-S/P for different increment of powers and  $t_{cell}^{cyc} =$   
771  $t_{cell}^{std}$ . Different colors indicate different cells. Inset represents threshold power to activate the cells  
772 under steady illumination with  $t_{std} = 5ms$ . **(F)** Gain of number of activated cells in Multi-S/P for  
773 different increment of power and  $t_{exp}^{cyc} = t_{exp}^{std} = 5ms$ . Different colors indicate different cells. Inset  
774 represents threshold power to activate the cells under steady illumination with  $t_{std} = 5ms$ .  
775  
776

777

778

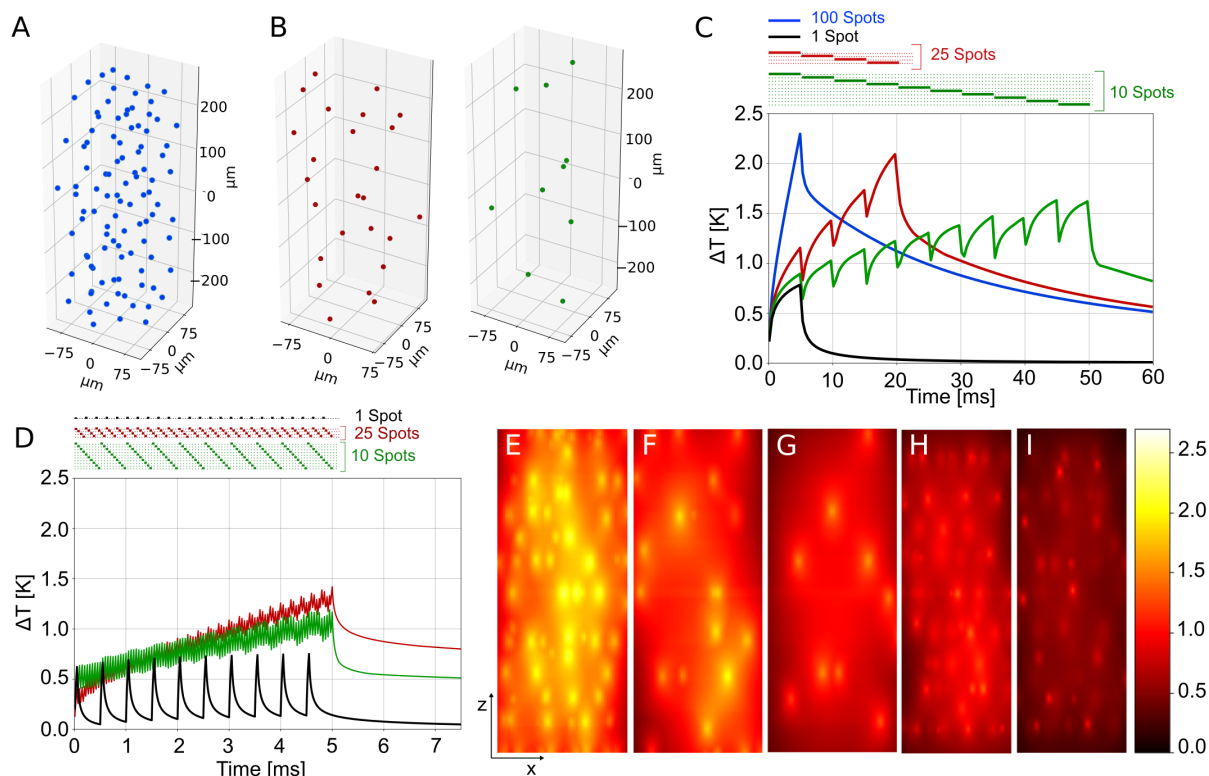

779

780

781 **Figure 5: Simulated Temperature rise induced by FLiT activation under different S/P illumination**

782 **protocols. (A)** Three-dimensional view of a group of 100 spots randomly distributed in a

783  $200 \times 200 \times 500 \mu\text{m}^3$  volume. Spots were distributed to maximize nearest neighboring distance (average

784 distance between spots equals to  $50.7 \pm 6.8 \mu\text{m}$ ) **(B)** Representative three-dimensional view of one

785 subset of spots when the ensemble of spots in (A) are subdivided in  $n=4$  subsets with 25 spots each

786 (left) or in  $n=10$  subsets with 10 spots each (right). Average distance between spots equal to  $78.7 \pm$

787  $14.6 \mu\text{m}$  and  $106.0 \pm 23.7$  for  $n=4$  and 10, respectively. **(C)** Temperature rise in the hottest location at

788 any given time induced by steadily illuminating 100 spots as shown in (A) either in parallel with

789  $t_{exp} = t_{std} = 5\text{ms}$  and global power  $P = 100 \cdot P_{std}$  (with  $P_{std} = 20\text{mW}$ ) (blue) or sequentially with

790  $n=4$  subsets of spots with  $t_{exp} = 20\text{ms}$  and global power per subset  $P = 25 \cdot P_{std}$  (red) or  $n=10$

791 subsets of spots with  $t_{exp} = 50\text{ms}$  and global power per subset  $P = 10 \cdot P_{std}$  (green). The

792 temperature rise induced by steadily illuminating one spot individually is also shown (black). The

793 illumination timing is represented at the top of the graph with horizontal bars: different horizontal

794 lines correspond to the timing of illumination of different subsets (illumination of one set of 100

795 spots (blue bar), 4 subsets of 25 spots (red bars), 10 subsets of 10 spots (green bars) and one single

796 spot (black bar)). **(D)** Temperature rise in the hottest location at any given time induced by cyclically

797 illuminating the 100 spots with  $n=4$  subsets of spots for a  $t_{exp} = 5\text{ms}$  ( $t_{cyc} = 50\mu\text{s}$ ;  $N_{cyc} = 25$ ) and global

798 power per subset  $P = 25\sqrt{4} \cdot P_{std}$  (red line) or  $n=10$  subsets of spots for a  $t_{exp}=5\text{ms}$   
799 ( $t_{cyc}=50\mu\text{s}$ ;  $N_{cyc}=10$ ) and global power per subset  $P = 10\sqrt{10} \cdot P_{std}$  (green line). The temperature  
800 rise induced by illuminating one spot individually under cyclic illumination with the same conditions  
801 of  $n=10$  subsets of spots is also shown (black line). The illumination timing is represented at the top  
802 of the graph with horizontal bars. Different horizontal lines correspond to the timing of illumination  
803 of different subsets (illumination of 4 subsets of 25 spots (red bars) and 10 subsets of 10 spots  
804 (green bars)). **(E-I)** xz projection of the max temperature rise produced by the 100 spots after 5 ms  
805 and simultaneous illumination of 100 spots (E); after 20 ms and sequential steady illumination with  
806  $n=4$  (F); after 50 ms and sequential steady illumination with  $n=10$  (G); after 4.6 ms and cyclic  
807 illumination with  $n=4$  (H); after 4.9 ms and cyclic illumination with  $n=10$  (I). Color bar ranges from 0 K  
808 to 2.5 K. FoV per image  $200 \times 500 \mu\text{m}^2$ .

809

810

811

812

813

## 814 REFERENCES

- 815
- 816 1. Yizhar, O., Fenno, L. E., Davidson, T. J., Mogri, M. & Deisseroth, K. Optogenetics in neural systems. *Neuron* **71**, 9–34 (2011).
  - 817 2. Fenno, L., Yizhar, O. & Deisseroth, K. The Development and Application of Optogenetics. *Annu. Rev. Neurosci.* **34**, 389–412 (2011).
  - 818 3. Chen, I.-W., Papagiakoumou, E. & Emiliani, V. Towards circuit optogenetics. *Curr. Opin. Neurobiol.* **50**, 179–189 (2018).
  - 819 4. Rickgauer, J. P. & Tank, D. W. Two-photon excitation of channelrhodopsin-2 at saturation. *Proc. Natl. Acad. Sci. U. S. A.* **106**, 15025–30 (2009).
  - 820 5. Ronzitti, E., Emiliani, V. & Papagiakoumou, E. Methods for Three-Dimensional All-Optical Manipulation of Neural Circuits. *Front. Cell. Neurosci.* **12**, 469 (2018).
  - 821 6. Accanto, N. *et al.* Multiplexed temporally focused light shaping for high-resolution multi-cell targeting. *Optica* **5**, 1478 (2018).
  - 822 7. Pégard, N. C. *et al.* Three-dimensional scanless holographic optogenetics with temporal focusing (3D-SHOT). *Nat. Commun.* **8**, 1228 (2017).
  - 823 8. Baker, C. A., Elyada, Y. M., Parra-Martin, A. & Bolton, M. Cellular resolution circuit mapping in mouse brain with temporal-focused excitation of soma-targeted channelrhodopsin. *Elife* **5**, 1–15 (2016).
  - 824 9. Shemesh, O. A. *et al.* Temporally precise single-cell-resolution optogenetics. *Nat. Neurosci.* **20**, 1796–1806 (2017).
  - 825 10. Mardinly, A. R. *et al.* Precise multimodal optical control of neural ensemble activity. *Nat. Neurosci.* **21**, 881–893 (2018).
  - 826 11. Marshel, J. H. *et al.* Cortical layer-specific critical dynamics triggering perception. *Science (80-. )*. (2019). doi:10.1126/science.aaw5202
  - 827 12. Carrillo-Reid, L., Han, S., Yang, W., Akrouh, A. & Yuste, R. Controlling Visually Guided Behavior by Holographic Recalling of Cortical Ensembles. *Cell* **178**, 447–457.e5 (2019).
  - 828 13. McRaven, C. *et al.* High-throughput cellular-resolution synaptic connectivity mapping in vivo with concurrent two-photon optogenetics and volumetric Ca<sup>2+</sup> imaging. 1–27 (2020). doi:10.1101/2020.02.21.959650
  - 829 14. Spampinato, G. *et al.* All-optical interrogation of a direction selective retinal circuit by holographic wave front shaping. *bioRxiv* 1–36 (2019). doi:10.1101/513192
  - 830 15. Chettih, S. N. & Harvey, C. D. Single-neuron perturbations reveal feature-specific competition in V1. *Nature* (2019). doi:10.1038/s41586-019-0997-6
  - 831 16. Gill, J. V. *et al.* Precise Holographic Manipulation of Olfactory Circuits Reveals Coding Features Determining Perceptual Detection. *Neuron* **108**, 382–393 (2020).
  - 832 17. Ronzitti, E. *et al.* Recent advances in patterned photostimulation for optogenetics. *Journal of Optics* (2017).
  - 833 18. Papagiakoumou, E., Ronzitti, E. & Emiliani, V. Scanless two-photon excitation with temporal focusing. *Nat. Methods* **17**, 571–581 (2020).
  - 834 19. Hernandez, O. *et al.* Three-dimensional spatiotemporal focusing of holographic patterns. *Nat. Commun.* **7**, 11928 (2016).
  - 835 20. Sun, B. *et al.* Four-dimensional light shaping : manipulating ultrafast spatio-temporal foci in space and time. *ArXiv* 1–14 (2017).
  - 836 21. Chaigneau, E. *et al.* Two-Photon Holographic Stimulation of ReaChR. *Front. Cell. Neurosci.* **10**, 234 (2016).
  - 837 22. Picot, A. *et al.* Temperature Rise under Two-Photon Optogenetic Brain Stimulation. *Cell Rep.* **24**, 1243–1253.e5 (2018).
  - 838 23. Liu, C. & *et al.* . -*In Prep.*
  - 839 24. Ronzitti, E. *et al.* Submillisecond Optogenetic Control of Neuronal Firing with Two-Photon Holographic Photoactivation of Chronos. *J. Neurosci.* **37**, 10679–10689 (2017).
  - 840 25. Chen, I.-W. *et al.* In vivo sub-millisecond two-photon optogenetics with temporally focused patterned light . *J. Neurosci.* **39**, 1785–18 (2019).
  - 841 26. Rickgauer, J. P., Deisseroth, K. & Tank, D. W. Simultaneous cellular-resolution optical perturbation and imaging of place cell firing fields. *Nature neuroscience* **17**, 1816–24 (2014).
  - 842 27. Begue, A. *et al.* Two-photon excitation in scattering media by spatiotemporally shaped beams and their application in optogenetic stimulation. *Biomed Opt Express* **4**, 2869–2879 (2013).

- 870 28. Yang, W., Carrillo-Reid, L., Bando, Y., Peterka, D. S. & Yuste, R. Simultaneous two-photon  
871 optogenetics and imaging of cortical circuits in three dimensions. *Elife* **7**, e32671 (2018).
- 872 29. Forli, A. *et al.* Two-Photon Bidirectional Control and Imaging of Neuronal Excitability with High Spatial  
873 Resolution In Vivo. *Cell Rep.* **22**, 3087–3098 (2018).
- 874 30. Lyall, E. H., Mossing, D. P., Pluta, S. R., Dudai, A. & Adesnik. Synthesis of higher order feature 1 codes  
875 through stimulus-specific supra-linear summation. *bioRxiv* 1–42 (2020).
- 876 31. Dan, Y. & Poo, M. Spike Timing-Dependent Plasticity of Neural Circuits. *Neuron* **44**, 23–30 (2004).
- 877 32. Froemke, R. C. & Dan, Y. Spike-timing-dependent synaptic modification induced by natural spike trains.  
878 *Nature* (2002). doi:10.1038/416433a
- 879 33. Markram, H., Lu, J., Frotscher, M. & Sakmann, B. Regulation of Synaptic Efficacy by Coincidence of  
880 Postsynaptic APs and EPSPs. *Science (80-. )*. **275**, 213–215 (1997).
- 881 34. Udakis, M., Pedrosa, V., Chamberlain, S. E. L., Clopath, C. & Mellor, J. R. Interneuron-specific plasticity  
882 at parvalbumin and somatostatin inhibitory synapses onto CA1 pyramidal neurons shapes hippocampal  
883 output. *Nat. Commun.* **11**, (2020).
- 884 35. Tazerart, S., Mitchell, D. E., Miranda-Rottmann, S. & Araya, R. A spike-timing-dependent plasticity rule  
885 for dendritic spines. *Nat. Commun.* (2020). doi:10.1038/s41467-020-17861-7
- 886 36. Di Lorenzo, F. *et al.* Impaired Spike Timing Dependent Cortico-Cortical Plasticity in Alzheimer’s Disease  
887 Patients. *J. Alzheimer’s Dis.* (2018). doi:10.3233/JAD-180503
- 888 37. Feldman, D. E. The Spike-Timing Dependence of Plasticity. *Neuron* **75**, 556–571 (2012).
- 889 38. Chong, E. *et al.* Manipulating synthetic optogenetic odors reveals the coding logic of olfactory  
890 perception. *Science (80-. )*. **368**, (2020).
- 891 39. Klapoetke, N. C. *et al.* Independent optical excitation of distinct neural populations. *Nat. Methods* **11**,  
892 338–46 (2014).
- 893 40. Yang, W., Carrillo-Reid, L., Bando, Y., Peterka, D. S. & Yuste, R. Simultaneous two-photon imaging and  
894 two-photon optogenetics of cortical circuits in three dimensions. *Elife* **7**, e32671 (2018).
- 895 41. Chen, I.-W. *et al.* Parallel holographic illumination enables sub-millisecond two-photon optogenetic  
896 activation in mouse visual cortex in vivo. *BioArxiv* (2018). doi:10.1101/250795
- 897 42. Parot, V. J., Nichols, S., Testa-Silva, G. & Cohen, A. E. Microsecond Timescale Selective Access Two-  
898 photon Targeting for Functional Measurements in Tissue. in *Biophotonics Congress: Biomedical Optics*  
899 *2020(Translational, Microscopy, OCT, OTS, BRAIN)* (2020).
- 900 43. Wijesinghe, P., Escobet-Montalbán, A., Chen, M., Munro, P. R. T. & Dholakia, K. Optimal compressive  
901 multiphoton imaging at depth using single-pixel detection. *Opt. Lett.* **44**, 4981 (2019).
- 902 44. Ji, N., Freeman, J. & Smith, S. L. Technologies for imaging neural activity in large volumes. *Nature*  
903 *Neuroscience* **19**, 1154–1164 (2016).
- 904 45. Lutz, C. *et al.* Holographic photolysis of caged neurotransmitters. *Nat. Methods* **5**, 821–7 (2008).
- 905 46. Gerchberg, R. W. & Saxton, W. O. A practical algorithm for the determination of the phase from image  
906 and diffraction pictures. *Optik (Stuttg.)*. **35**, 237–246 (1972).
- 907 47. Hernandez, O. *et al.* Three-dimensional spatiotemporal focusing of holographic patterns. *Nat.*  
908 *Commun.* **7**, 11928 (2016).
- 909 48. Gähwiler, B. H., Capogna, M., Debanne, D., McKinney, R. A. & Thompson, S. M. Organotypic slice  
910 cultures: A technique has come of age. *Trends Neurosci.* **20**, 471–477 (1997).
- 911 49. Fourier, J. B. J. *Theorie Analytique de la Chaleur.* (1822).
- 912 50. Evans, B. D., Jarvis, S., Schultz, S. R. & Nikolic, K. PyRhO: A Multiscale Optogenetics Simulation Platform.  
913 *Front. Neuroinform.* **10**, 8 (2016).
- 914 51. Bansal, H., Gupta, N. & Roy, S. Theoretical Analysis of Low-power Bidirectional Optogenetic Control of  
915 High-frequency Neural Codes with Single Spike Resolution. *Neuroscience* **449**, 165–188 (2020).
- 916 52. Grossman, N. *et al.* The spatial pattern of light determines the kinetics and modulates backpropagation  
917 of optogenetic action potentials. *J. Comput. Neurosci.* **34**, 477–488 (2013).
- 918 53. Nikolic, K. *et al.* Photocycles of channelrhodopsin-2. *Photochem. Photobiol.* **85**, 400–411 (2009).
- 919  
920  
921
